## REVIEW

# Cellular and molecular insights into Hox protein action

René Rezsohazy<sup>1,\*</sup>, Andrew J. Saurin<sup>2</sup>, Corinne Maurel-Zaffran<sup>2</sup> and Yacine Graba<sup>2,\*</sup>**ABSTRACT**

Hox genes encode homeodomain transcription factors that control morphogenesis and have established functions in development and evolution. Hox proteins have remained enigmatic with regard to the molecular mechanisms that endow them with specific and diverse functions, and to the cellular functions that they control. Here, we review recent examples of Hox-controlled cellular functions that highlight their versatile and highly context-dependent activity. This provides the setting to discuss how Hox proteins control morphogenesis and organogenesis. We then summarise the molecular modalities underlying Hox protein function, in particular in light of current models of transcription factor function. Finally, we discuss how functional divergence between Hox proteins might be achieved to give rise to the many facets of their action.

**KEY WORDS:** Hox, Homeodomain, Morphogenesis**Introduction**

Hox genes play fundamental roles in controlling the final morphology of bilaterian animals (Krumlauf, 1994; Pearson et al., 2005). Both loss and gain of Hox gene activity often result in homeotic transformations characterised by the appearance of an organ or structure that is normally formed elsewhere in the animal. Hox genes display several levels of evolutionary conservation (Fig. 1). First, at a structural level, they are often clustered in complexes, an organisation that is likely to reflect their phylogeny and regulatory constraints on their expression (Duboule, 2007; Mallo and Alonso, 2013). Second, at the molecular level, they all encode homeodomain transcription factors (Gehring et al., 1994). Third, in terms of function, they provide similar contributions in most animals and can even substitute the function of an orthologue in another species (McGinnis et al., 1990). Importantly, variation in Hox gene number, expression pattern and protein activity has played a major role in the evolution of the metazoan body plan (Gellon and McGinnis, 1998). Hox genes have also been associated with a number of human diseases (Quinonez and Innis, 2014), highlighting the fact that Hox proteins are key factors in development, evolution and physiopathological processes.

Several decades of developmental studies have set the basis for a comprehensive, although not definitive, picture of the processes modulated by Hox genes. For example, initial studies recognised the patterning functions of Hox genes, showing that they provide axial positional information and contribute to defining cellular territories and establishing boundaries. More recent work showed that Hox genes also provide contributions to organogenesis per se (Hombria and Lovegrove, 2003) through the control of a variety of cellular functions including differentiation, proliferation, migration or death

(Sanchez-Herrero, 2013). Although various molecular functions have been attributed to Hox proteins, including non-transcriptional functions such as replication and translation (Miotto and Graba, 2010; Rezsohazy, 2014) (Box 1), Hox proteins are best known as transcription factors. Consequently, it is thought that their functions rely on the selective activation (or repression) of downstream gene networks. In recent years, the search for Hox target genes has identified a wide range of downstream factors of diverse biological function (Choo and Russell, 2011; Graba et al., 1992; Hueber et al., 2007), including regulatory functions (e.g. signalling molecules or components of signalling pathways, transcription factors) and the so-called realiser genes that are more directly involved in morphogenetic processes.

The general path underlying Hox gene function – from the regulation of targets and gene regulatory networks to the control of patterning and cellular functions – has long been recognised (Fig. 2). However, there are several substantial gaps along this path. The molecular mechanisms underlying transcriptional regulation by Hox proteins are still poorly understood, and only a few Hox-dependent gene regulatory networks have been characterised. How these networks ultimately interface with the control of cellular functions also remains elusive. In addition, it is unclear how distinct or similar the paths for each Hox protein are. In this Review, we examine Hox transcription factor function at the cellular and molecular scale and discuss the extent to which this multiscale view allows a comprehensive understanding of how Hox proteins instruct differential morphogenesis.

**An overview of the Hox gene family**

Hox proteins have two distinctive and highly conserved features: the hexapeptide (HX) motif and the homeodomain (HD). The HX mediates contact with members of the PBC class of proteins, such as Extradenticle (Exd) in *Drosophila* (Mann and Chan, 1996). The HD is a widely used DNA-binding motif that is also found in non-Hox proteins. The HD folds into a triple helical structure, with the HD N-terminal arm contacting the DNA in the minor groove, and helix 3, which is also termed the recognition helix, contacting the DNA in the major groove (Fig. 1A). Sequence conservation within Hox HDs is concentrated in helices 1 and 3, although some positions of the N-terminal arm and loops between the helices are also well conserved (Fig. 1A).

Hox genes are often clustered in the genome and are thought to originate from the last common ancestor of bilaterian animals, which is proposed to harbour a cluster of at least seven Hox genes (García-Fernández, 2005). During the Cambrian explosion, the number of Hox genes increased, notably through specific gene as well as genome duplications (Duboule, 2007). Vertebrates thus display thirteen paralogue groups (PGs). Each PG comprises genes that occupy similar positions within genomic clusters (although with some exceptions, for example in *Caenorhabditis elegans*) and exhibit similar expression patterns and functions across species. Animals such as *Drosophila melanogaster* and *C. elegans* have a single Hox complement, whereas those that have undergone genome

<sup>1</sup>Institut des Sciences de la Vie, Université Catholique de Louvain, Louvain-la-Neuve B-1348, Belgium. <sup>2</sup>Aix Marseille Université, CNRS, IBDM, UMR 7288, Marseille 13288, Cedex 09, France.

\*Authors for correspondence (rene.rezsohazy@uclouvain.be; yacine.graba@univ-amu.fr)

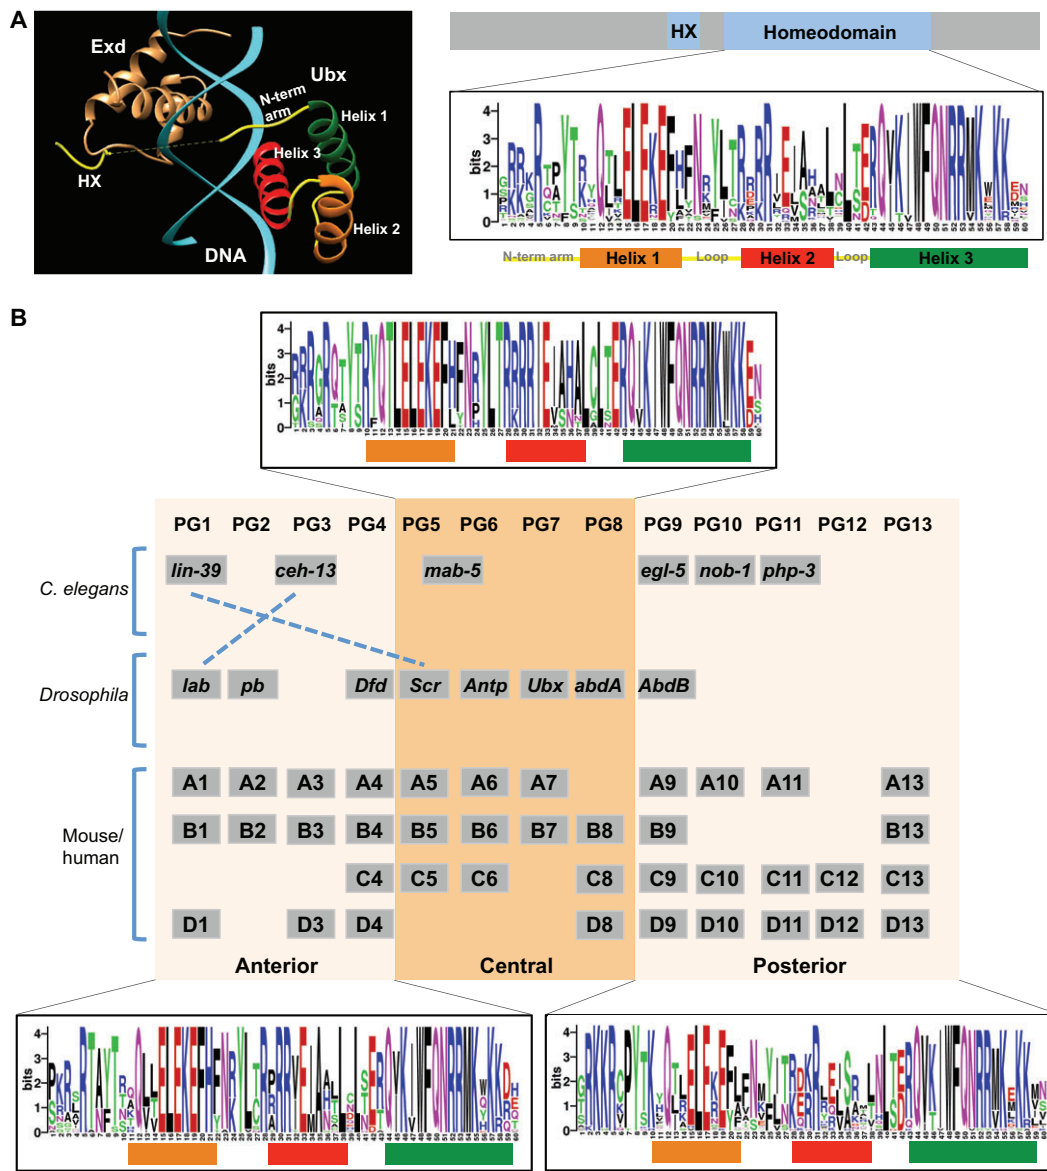

**Fig. 1. Hox genes and proteins.** (A) The hexapeptide (HX) motif and the homeodomain (HD) are the most prominent sequence signatures of Hox proteins. The sequence of the HD is highly conserved, as illustrated here by a WebLogo (established using weblogo.berkeley.edu software) derived from a compilation of human/mouse and *D. melanogaster* sequences. The HD contains three alpha helices and contacts DNA in the major (via helix 3) and minor (via the N-terminal arm) grooves. The HX, a short motif located upstream of the HD, contacts protein partners of the PBC class, which are also HD-containing proteins, allowing the cooperative assembly of a Hox-PBC-DNA complex, here illustrated by the Ubx-Exd-DNA crystal structure (1B8I; Passner et al., 1999). (B) Representation of *C. elegans*, *D. melanogaster*, mouse and human Hox clusters. Paralogous groups (PGs) are classified as anterior, central and posterior classes. Hox genes are arranged in order along chromosomes according to their PG, with the exception of *ceh-13* (PG1) and *lin-39* (PG5) in *C. elegans*, the genomic locations of which are reversed (as indicated by dashed lines). WebLogos illustrating the HD conservation within each class highlights that the central class HDs display high conservation, whereas the anterior, and to a greater extent the posterior, class display less conservation. The subregions of the HD that are best conserved also vary within the different classes.

duplications have several Hox gene clusters, such as four for mammals and seven in actinopterygians (Amores et al., 2004). Paralogous Hox proteins also display high levels of sequence conservation, mostly within the HD, with HDs from different animals but in the same PG displaying greater similarity than any other Hox HDs within the same animal. PGs are also clustered in anterior, central and posterior classes, reflecting their domains of expression and action, but also correlating with the level of sequence conservation within the HD (Fig. 1B).

**The cellular side of Hox activity**

Recent reviews have summarised the many different cellular functions controlled by Hox proteins, including changes in cell

shape and migration, proliferation or programmed cell death and differentiation (Cerdá-Esteban and Spagnoli, 2014; Philippidou and Dasen, 2013; Sanchez-Herrero, 2013; Shah and Sukumar, 2010; Taniguchi, 2014). Here, we review phenotypes associated with Hox gene dysfunction/manipulation that provide insights, at least at the phenomenological level, into how Hox genes achieve their functions. The examples chosen do not aim to provide an exhaustive overview but offer sufficient coverage to illustrate the diversity of cellular behaviours controlled by Hox proteins.

As early as during gastrulation in birds and mammals, Hox genes are expressed in an orderly temporal way in cells of the epiblast before their ingress into the primitive streak. It has been suggested that this expression controls the migratory properties of cells and the

**Box 1. Non-transcriptional activities of Hox proteins**

Hox proteins have been linked to DNA replication, DNA repair, mRNA translation and protein degradation. Furthermore, large-scale interaction screenings have identified additional Hox interactors that are active in these processes, suggesting that the non-transcriptional activities of Hox proteins are likely to be underestimated (Bondos et al., 2006; Lambert et al., 2012; Ravasi et al., 2010).

**DNA replication.** Several Hox proteins stimulate pre-replication complex assembly and DNA replication. They associate with replication origins and interact with geminin, an inhibitor of replication licensing, as well as with licensing factors (Comelli et al., 2009; Luo et al., 2004; Marchetti et al., 2010; Salsi et al., 2009).

**DNA repair.** HOXB7 stimulates the DNA-dependent protein kinase at the onset of DNA repair via non-homologous end joining (NHEJ), and HOXB7 and Hox PG4 proteins interact with NHEJ proteins (Rubin et al., 2007; Schild-Poulter et al., 2001).

**Translation.** HOXA9 interacts with the translation initiation factor eIF4E and stimulates mRNA nuclear export and polysome loading. This interaction relies on a protein motif that is conserved among several Hox proteins, suggesting a broader control of translation by Hox proteins (Topisirovic et al., 2005).

**Protein degradation.** Hox proteins control the formation and activity of E3 ubiquitin ligase complexes: Hoxb4 and Hoxa9 promote geminin degradation (Ohno et al., 2013, 2010); HOXB13 interacts with cyclin D1 and promotes its degradation (Hamid et al., 2014); HOXA2 interacts with the E3 ubiquitin ligase RCHY1 and promotes its proteasome-mediated decay (Bergiers et al., 2013); HOXC10 interacts with CDC27, a core subunit of the anaphase-promoting complex (APC), an E3 ubiquitin ligase complex that is involved in mitosis exit (Gabellini et al., 2003).

timing of ingress (Imura and Pourquié, 2006). Later on, Hox genes assist cells in migration and, in the case of the central nervous system, in establishing networks and circuits (Gavalas et al., 1997), for example during the establishment of somatosensory topographic projections and wiring (Oury et al., 2006), in building up the precerebellar system relaying inputs to the cerebellum (Di Meglio et al., 2013; Geisen et al., 2008), or in the development of central auditory circuits in the mouse (Di Bonito et al., 2013). In *C. elegans*, Hox proteins also contribute to control neuroblast cell migration (Tamayo et al., 2013). Furthermore, in zebrafish, Hox genes have been highlighted as controlling collective cell migration in the development of the mechanoreceptive lateral line (Breau et al., 2013). In all these situations, Hox proteins control receptor/ligand expression leading to attractive/repulsive interactions between migrating cells and the environment that they travel through. Modulating cell shape is another way to control single or collective cell migration and tissue remodelling, and Hoxb1b has recently been shown to regulate microtubule dynamics during the process of neural tube formation in zebrafish (Zigman et al., 2014). Hox proteins also directly regulate cell shape, cell-to-cell communication and signalling to properly delimit functional and morphological borders between vertebrate hindbrain segments (Prin et al., 2014), and the *Drosophila* Hox protein Abdominal B (AbdB) has been shown to coordinate the modifications in cell adhesion and cytoskeleton required for cell shape changes and invagination during development of the posterior spiracle, which constitutes the posterior end of the larval respiratory system (Castelli Gair Hombria et al., 2009).

Hox proteins can also couple differentiation with morphogenesis, controlling cell fate decisions along differentiation lineages. PG9 genes, for example, are implicated in mammary gland maturation, expansion and differentiation (Chen and Capecchi, 1999). The control of cell differentiation has also been well documented for Hoxa5 in the mouse, which instructs epithelia from stromal cells in

the lungs, gut and mammary gland (Aubin et al., 2002; Boucherat et al., 2012; Garin et al., 2006). In vertebrates, several Hox genes have been shown to either promote or inhibit vascular development or remodelling (Stoll and Kroll, 2012), supporting a general view that Hox proteins directly modulate effector genes involved in the control of cell-cell and cell-extracellular matrix interactions (Kachgal et al., 2012; Winnik et al., 2009). The skin is another organ in which several Hox proteins play roles in controlling differentiation, acting both as effector transcription factors, for example in the direct control of keratin genes in mammals, but also as ‘upper’ regulators, acting at a high level in the regulatory network hierarchy (Godwin and Capecchi, 1998; Johansson and Headon, 2014; La Celle and Polakowska, 2001; Potter et al., 2011; Rinn et al., 2008). Distinct Hox proteins are also expressed in the endometrium and appear functionally important for endometrial cell differentiation and receptivity (Lu et al., 2008; Xu et al., 2014). In *Hoxd11-13* mutant mice, chondrocyte differentiation is arrested at an early stage, and shortly after birth these chondrocytes undergo rapid maturation and replacement by osteoblasts, thereby shortening bones (González-Martín et al., 2014). HOXA10 has been shown to sustain osteoblastogenesis (Gordon et al., 2011; Hassan et al., 2007). During haematopoiesis, several Hox genes contribute to the control of cell stemness versus differentiation (Alharbi et al., 2013). In this context, HOXB4 seems to act both in a cell-autonomous and non-cell-autonomous manner, possibly via effects on the establishment of the haematopoietic stem cell (HSC) niche (Jackson et al., 2012). Similarly, AbdB controls the stem cell niche in the *Drosophila* testis, notably by non-cell-autonomous regulation of centrosome orientation and the division rates of germline stem cells (Papagiannouli et al., 2014).

Hox proteins can also modulate cell proliferation and cell cycle progression. Among recently reported examples, Antennapedia (*Antp*) was shown to control cell cycle exit in *Drosophila* neuroblasts (Baumgardt et al., 2014). In zebrafish, Hoxb8a controls cell proliferation in the primordia that will contribute to the development of the lateral line (Breau et al., 2013). There are also several examples in which Hox proteins exhibit oncogenic activities, in particular in the context of leukaemia (Shah and Sukumar, 2010). Furthermore, in murine models of leukaemia, Hoxa9 has recently been shown to directly regulate cell cycle regulators together with CCAAT/enhancer-binding protein alpha (*Cebp $\alpha$* ) (Collins et al., 2014) and the methyltransferase G9a (*Ehmt2*) (Lehnertz et al., 2014).

Several instances suggest that Hox activity can impact on the decision to engage programmed cell death, for example during Hox-mediated regulation of the cell death gene *reaper* in *Drosophila* (Lohmann et al., 2002; Stöbe et al., 2009). The *C. elegans* LIN-39 Hox protein suppresses inappropriate apoptosis in male-specific serotonergic neuron precursors (Kalis et al., 2014), and MAB-5, another *C. elegans* Hox protein, directly controls apoptosis in pro-neural ventral blast cells (Liu et al., 2006). Hoxd gene deletions cause an up to 6-fold increase in apoptosis during kidney development in mice (Di-Poï et al., 2007). By contrast, *Hoxa13* loss-of-function mouse mutants show defects in interdigital apoptosis (Post et al., 2000; Stadler et al., 2001), whereas HOXA5 stimulates apoptosis in human and mouse breast tissue by regulating *p53* (*TP53/TRP53*), *Twist* and caspase 2 and 8 genes (Chen et al., 2004; Raman et al., 2000; Stasinopoulos et al., 2005).

Whether this multitude of functions reflects pleiotropic actions of Hox proteins or, alternatively, a far upstream ‘master’ gene regulatory activity has only rarely been investigated. In the few instances in which Hox-dependent gene regulatory networks have

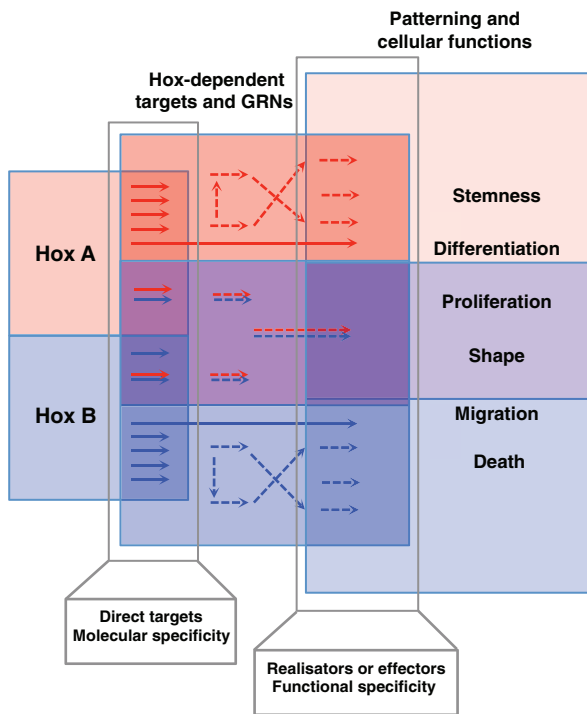

**Fig. 2. The path of Hox protein action.** Two symbolic Hox proteins, A (red) and B (blue), control distinct (red and blue arrows and boxes) or shared (overlapping red and blue areas) direct targets (solid arrows), which belong to partially overlapping and/or convergent gene regulatory networks (GRNs), including Hox downstream indirect targets (dashed arrows). The outcome of these networks consists of changes in the expression of ‘realisator’ or ‘effector’ genes, which act at the heart of cellular processes such as patterning, differentiation, proliferation, migration or cell shaping.

been dissected, it appears that both scenarios exist. Hox genes can, for example, initiate a unique gene regulatory network, acting at the very top of such a network (Lovegrove et al., 2006). They can also locally modify gene regulatory networks that are at work in distinct body parts, by acting at several levels of the networks and micromanaging different aspects of organogenesis (Weatherbee et al., 1999).

**The functional versatility of Hox proteins**

The examples discussed above highlight the diversity of functions controlled by Hox proteins and underscore the molecular complexity through which these functions are regulated. Part of this complexity emerges from the variety of functions that each Hox protein endows, highlighting the importance of cell context in conditioning the outcome of Hox protein activity. A few examples of versatile Hox protein functions, for which the underlying molecular modalities have started to emerge, are discussed below.

In the mammary gland, HOXA5 promotes apoptosis and p53 expression; however, in the context of haematopoiesis, HOXA5 does not seem to act as a tumour suppressor (Bach et al., 2010). Furthermore, whereas HOXA9 is a severe oncogene in promoting leukaemia, it inhibits tumour growth and metastasis in the mammary gland (Gilbert et al., 2010; Sun et al., 2013). During skin development, HOXA7 inhibits keratinocyte differentiation by repressing the transglutaminase gene *TGMI* (La Celle and Polakowska, 2001). By contrast, *TGMI* is activated by HOXA7 in carcinoma. This context specificity and versatility in Hox-controlled cellular functions is further exemplified by HOXB4, which is expressed in the basal cell layer of the developing skin and

in supra-basal cell layers in adult skin (Komuves et al., 2002). Whereas the basal cells of the developing skin are proliferating and exhibit strong HOXB4 expression, the supra-basal cell layers of the adult skin are PCNA negative and show low or no proliferation. The relative abundance of HOXB4, however, appears to be lower in supra-basal cells of the adult than in basal cells of the developing skin. This points towards both context-dependent and expression level-dependent outcomes of HOXB4 activity in skin cells. Similar conclusions can be drawn for HOXB6, which is found in the supra-basal layer of early developing skin then in upper layers at foetal and adult stages; the protein is mainly cytoplasmic at the foetal stage then nuclear in adulthood (but again cytoplasmic in carcinomas), and studies show that it is expressed as a truncated (cytoplasmic) variant in undifferentiated cells but as a full-length (nuclear) protein upon differentiation (Komuves et al., 2000).

The control of haematopoietic stemness provides another well-studied example of versatile and context-specific Hox protein function, and also highlights the existence of partnering with other transcription factors. Hoxb4 modulates HSC responsiveness to several extrinsic cues and displays a dose-dependent effect on HSC self-renewal, supporting normal differentiation versus perturbed differentiation (Klump et al., 2005; Schiedlmeier et al., 2007; Will et al., 2006). Context-specific HOXB4/Hoxb4 activity and promoter occupancy have been highlighted by genome-wide searches for targets, and these studies have revealed the dynamics of the Hoxb4 regulatory network in the embryonic stem to haematopoietic progenitor cell differentiation process (Fan et al., 2012; Oshima et al., 2011). Hoxb4 ChIP peaks correlate with known haematopoietic transcription factor binding sites or ChIP peaks, suggesting that Hoxb4 functions in a combinatorial fashion during haematopoiesis.

The functional versatility of Hox proteins is again exemplified during prostate cancer development. In prostate physiopathology, HOXB13 acts either as a tumour suppressor or as an oncogene, depending on the type of cancer cell. Some prostate cancers are known to grow in response to androgens, and HOXB13 is a bivalent regulator of the androgen receptor (AR) (Norris et al., 2009), positively or negatively regulating AR interactions with chromatin. This in turn modulates the cell response to androgens. In addition, in androgen-responsive prostate cancer cell models, HOXB13 activity results in a decrease in pRb (retinoblastoma 1) phosphorylation, which then leads to pRb-E2F complex stabilisation and growth inhibition (Hamid et al., 2014). By contrast, HOXB13 can be overexpressed in androgen-refractory prostate tumours, stimulating tumour progression rather than being an oncosuppressor (Kim et al., 2010). In these tumours, HOXB13 appears to inhibit p21 (CDKN1A), which then allows E2F activation and cell cycle progression.

Finally, the versatility of Hox protein function may also result from post-translational modifications. Phospho isoforms of *Drosophila* Ultrabithorax (Ubx), for example, have long been recognised (Gavis and Hogness, 1991), and changes in *Drosophila* Antp and Sex combs reduced (Scr) protein activities upon phosphorylation have been demonstrated (Berry and Gehring, 2000; Jaffe et al., 1997). It was also suggested that phosphorylation has influenced the evolution of Ubx limb-repressing function in the arthropod lineage (Ronshaugen et al., 2002). In vertebrates, HOXA10 expression accompanies myeloid differentiation and, in this context, HOXA10 acts both as an activator and a repressor at different stages of myelopoiesis, with its activity being regulated by tyrosine phosphorylation and dephosphorylation (Bei et al., 2007; Eklund et al., 2002). HOXB7 can be polyADP-ribosylated by poly(ADP-ribose) polymerase 1

(PARP1), which then results in a decrease in HOXB7 transcriptional activity (Wu et al., 2012). How extensively Hox proteins are modified post-translationally, including ubiquitylation, sumoylation and acetylation, and how these modifications impact on the activity of Hox proteins remains underexplored and certainly deserves deeper investigation.

**Hox proteins as transcription factors: the Hox-PBC partnership and modes of action**

Understanding the diversity and specificity of Hox protein function as well as the versatile nature of Hox protein activity requires us to examine how Hox proteins act as transcription factors. Hox proteins share a highly conserved HD, raising the issue of how functional specificity is achieved (Hayashi and Scott, 1990). HDs are found in a large number of transcription factors, display a wide range of sequence variations, and in some instances are associated with other DNA-binding domains. A survey of the DNA binding properties of nearly all *Drosophila* and mouse HDs showed that divergent HDs recognise distinct DNA sequences but that, within a given group, high-affinity binding sites are shared by all members (Berger et al., 2008; Noyes et al., 2008). Furthermore, with the exception of the posterior Hox class (AbdB in *Drosophila*), all Hox proteins fall within a single HD class, the so-called Antennapedia (Antp) class, in which the HD is not associated with an additional DNA-binding domain, providing little if any apparent molecular ground for the distinct functions of individual Hox proteins.

Our current view of how Hox proteins act was profoundly influenced by the early identification of PBC class proteins, which function as general Hox co-factors (Fig. 3). Like Hox proteins, the PBC class comprises evolutionarily conserved HD-containing

proteins. Initially identified as a leukemic fusion to E2, PBC proteins belong to the TALE class of HD proteins, which are characterised by a three amino acid loop extension (Bürglin, 1998). It was shown that Exd, the single representative of the PBC class in flies, is required for proper Hox protein activity (Peifer and Wieschaus, 1990) and promotes Hox cooperative DNA binding (Chan et al., 1994; van Dijk and Murre, 1994). Similarly, vertebrate Pbx proteins have been shown to promote Hox cooperative DNA binding (Phelan et al., 1995), and functional studies in the field of cancer and developmental biology provided functionally relevant contexts for such associations (Moens and Selleri, 2006). Although providing a step forward in terms of understanding Hox protein specificity, the PBC partnership still raises the issue of how Hox proteins could adopt distinct functions by interacting with a member of the single Pbx class in vertebrates or a single protein (Exd) in *Drosophila*.

The consensus DNA sequence bound by Hox-PBC complexes is 5'-TGATNNATNN-3'; the first four nucleotides bind the PBC protein, while the remainder are used for Hox binding (Fig. 4). This sequence is significantly longer than that recognised by Hox monomers, improving de facto specificity, and in most instances is different from the monomeric binding site, indicating that the interaction with PBC proteins modifies Hox DNA binding. Extensive analysis of DNA binding sites recognised by all *Drosophila* Hox proteins in association with Exd using the Selex-Seq experimental platform (Slattery et al., 2011b) indicated that the presence of Exd uncovers Hox latent binding site preferences. The distinction between preferred DNA sequences mostly, but not uniquely, lies on the central NN nucleotides. Interestingly, these central nucleotides were previously shown to influence the binding site preference and functional specificity of the *Drosophila* Labial (Lab) and Deformed (Dfd) Hox proteins (Chan et al., 1997).

Hox-PBC interactions were shown to rely on a highly conserved interaction mode involving, on the Hox side, the HX motif that lies upstream of the HD, and, on the PBC side, the TALE peptide that lies between helices 1 and 2 of the HD (Johnson et al., 1995; Joshi et al., 2007; LaRonde-LeBlanc and Wolberger, 2003; Passner et al., 1999; Piper et al., 1999; Shen et al., 1996). Taken together with the recognised importance, mostly from chimeric protein analysis, of the N-terminal arm of the HD in Hox protein specificity, it was proposed that the HX, the linker region separating the HX from the HD, and the HD N-terminal arm constitute a specificity module (Joshi et al., 2010). This specificity module contacts the PBC partner through the HX motif, which in turn geometrically constrains the linker region to ultimately position the N-terminal arm of the HD within the DNA minor groove. This positioning relies on different, yet difficult to uncouple, mechanisms involving DNA minor groove shape recognition and base-specific recognition (Joshi et al., 2007).

This specificity module, which displays some paralogue specificity, and its role in DNA binding site selectivity provide important foundations for distinguishing the activity of Hox proteins belonging to different PGs, and support the notion that sequence divergence of Hox PG proteins drives functional diversification. Yet it is insufficient to account for Hox protein specificity, as it has on its own insufficient predictive value (Ebner et al., 2005). For example, the Lab-Exd complex was shown to recognise Hox/PBC composite sequences bearing different nucleotides at the junction between the Hox and Exd half-sites: GG, in an evolutionary conserved autoregulatory element of the *Hoxb1* gene (Chan et al., 1997; Pöpperl et al., 1995); TA in a

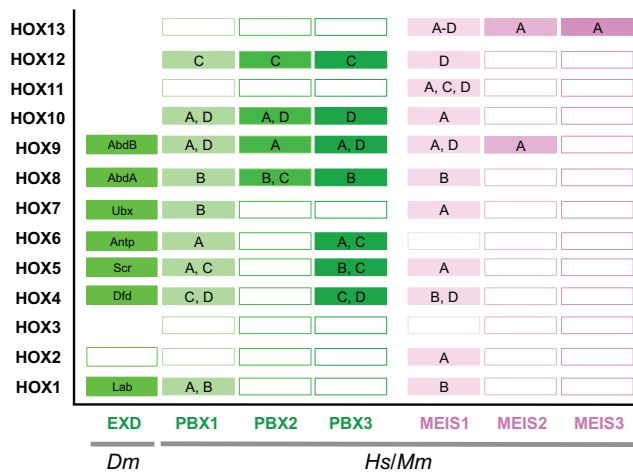

**Fig. 3. An overview of Hox-TALE interactions.** Summary of interactions between *Drosophila melanogaster* (*Dm*) and *Homo sapiens* (*Hs*)/*Mus musculus* (*Mm*) Hox proteins and Exd/Pbx (PBC, green) and Meis class (pink) TALE proteins. Boxes represent individual (*Dm*) or PG (*Hs/Mm*) Hox proteins. For *Hs* and *Mm* proteins, letters within boxes indicate the complex (HoxA, B, C or D) to which the Hox paralogue proteins belong. Empty boxes indicate absence of reported interactions. Interactions were collected from protein interaction databases as described by Rezsóhazy (2014), except for Antp and Lab, whose interaction with Exd is supported by Johnson et al. (1995) and Chan et al. (1996). For simplicity, and given the high level of protein conservation, interaction data for human and mouse have been pooled. No interactions with Hox proteins are reported within the interaction databases for *C. elegans* CEH-20 (Pbx homologue) and UNC-62 (Meis homologue). No interactions are described between Hox proteins and Hth, the *Drosophila* Meis homologue.

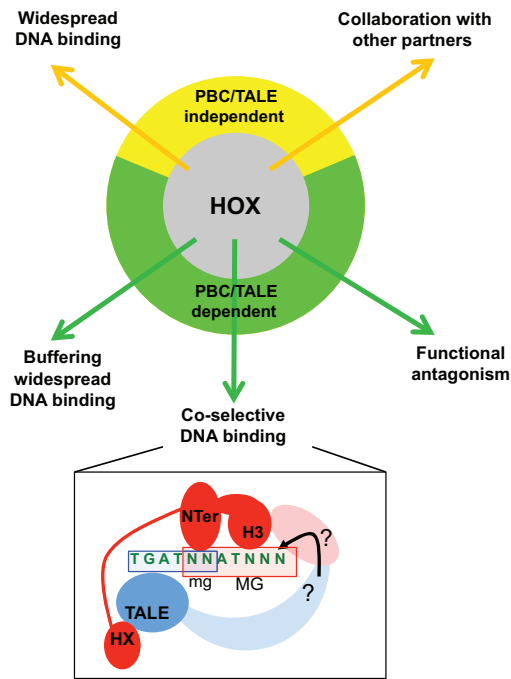

**Fig. 4. Multiple routes for Hox protein activity.** Known molecular modalities of Hox protein function, either PBC/TALE-dependent (green) or -independent (yellow), are depicted. The Hox-PBC co-selective mode of DNA binding that has been extensively investigated is schematised. The Hox (red) and PBC (blue) proteins contact contiguous DNA sequences: the PBC (blue box) and Hox (red box) half-sites. The interaction between the Hox HX motif and the hydrophobic pocket formed by the three amino acid loop extension that is characteristic of TALE proteins helps to position the N-terminal arm (Nter) of the Hox HD into the DNA minor groove (mg), a contact that defines the identity of the central NN nucleotides. The positioning of the HD recognition helix (helix 3, H3) in the DNA major groove (MG) through additional Hox-PBC interactions that are yet to be identified (pale red and blue domains with question marks), possibly involving sequences C-terminal to the Hox HD, might define the distal identity (NNN) of the Hox half-sites.

modified *lab* autoregulatory element (Grieder et al., 1997); and CA in a distinct *Lab* downstream target gene (Ebner et al., 2005). Conversely, *Lab* and *Scr* both recognise and act *in vivo* on sequences with identical nucleotides in the central position of the Hox/PBC consensus site. DNA sequence variations in the distal part of the Hox half-site, which are in a position to contact the Hox recognition helix, are also likely to play a role in defining Hox DNA binding specificity (Fig. 4). This highlights the existence of additional specificity mechanisms that remain to be elucidated, a prerequisite before we can reasonably predict the *in vivo* DNA binding site preferences of Hox paralogue proteins.

Additional protein partners, such as Homothorax (Hth) in *Drosophila* and the Meis class of proteins in vertebrates, are known to physically interact with, and influence the activity of, Hox-PBC-DNA regulatory complexes (Chan et al., 1997; Li-Kroeger et al., 2008; Mann and Affolter, 1998; Ryoo et al., 1999). Genome-wide analysis of the DNA binding profile of Hth in the haltere, a flight balancing appendage, and leg imaginal discs highlighted a significant, yet only partial, overlap with that of the Hox protein *Ubx* (Choo et al., 2011; Slattery et al., 2011a). Similarly, in mouse, the genomic distribution of Meis proteins overlaps with those of *Hoxc9* and *Hoxa2* (Penkov et al., 2013). In the case of branchial arches, it was recently proposed that *Hoxa2* selectively enhances Meis binding to modify a Meis-dependent ground state into a second branchial arch identity, highlighting a role

for a Hox protein in specifying the activity of another transcription factor (Amin et al., 2015). How Hth/Meis and Hox proteins reciprocally modify their DNA binding preferences and functional specificities remains unclear and awaits structural characterisation of the Hox-PBC-Meis-DNA complexes that have been biochemically and functionally characterised.

#### Additional facets of Hox-PBC partnerships

Although not as well documented, partnerships with PBC proteins serve functions other than conferring Hox DNA binding specificity. Illustrative of this is the role of *Exd* in buffering the monomeric binding potential of the Hox protein *Lab*. Based on a change in *Lab* proteolytic pattern upon *Exd* binding, together with increased *Lab* monomeric binding and *in vivo* hyperactivity following mutation of the HX motif, it was proposed that the binding of *Exd* to *Lab* overcomes an inhibitory role of the HX on *Lab* DNA binding (Chan et al., 1996). Together with the observation that mutation of the HX also increases the monomeric binding of other Hox proteins, such as *Drosophila* *Antp* and *AbdB* and mouse *Hoxb8* (Hudry et al., 2012; Merabet et al., 2007), this suggests that Hox-PBC interactions might serve not only to promote binding selectivity, but also, at least for some Hox proteins, to concomitantly prevent the inappropriate binding of monomeric Hox proteins (Fig. 4).

The study of a *Ubx*-VP16 fusion protein that functionally mimics *Antp* led to the proposition that regulation of Hox activity contributes to the functional distinction of Hox paralogues (Li and McGinnis, 1999). Changes in Hox transcriptional activity were also proposed to underlie the evolution of morphological traits in arthropods (Galant and Carroll, 2002; Ronshaugen et al., 2002). How the regulation of activity relates to PBC partnership was addressed in the case of *Dfd*. Based on cell culture, *in vitro* biochemistry and functional studies in the *Drosophila* embryo, it was proposed that the HD inhibits *Dfd* transcriptional activation potential and that the interaction with *Exd* suppresses this inhibitory function (Li et al., 1999). In addition, the deletion of *Dfd* N-terminal domains in a *Dfd*-*Scr* chimera, in which the specificity module is that of *Scr*, resulted in a repression-to-activation switch in the regulation of the *forkhead* downstream target, further supporting a role for *Exd* in controlling the regulation of Hox activity (Joshi et al., 2010). How exactly the interaction with *Exd* impacts on Hox activity, and how general this function of *Exd* is, remain to be explored.

Although they generally provide a positive partnership with Hox proteins, *Exd* and Hth were recently found to antagonise the function of posterior Hox proteins. Using phenotypic and molecular analyses, it was shown that inappropriate maintenance of *Exd*/Hth expression in the posterior domain of the *Drosophila* embryo, where identity is specified by the posterior Hox gene *AbdB*, phenocopies *AbdB* loss of function (Rivas et al., 2013). Such an antagonistic relationship also applies to the repression of the limb-suppressing gene *Distalless* (*Dll*) by *AbdB* (Sambrani et al., 2013). This highlights a distinct Hox-PBC partnership, conveying antagonism instead of cooperation, and suggests that diversifying the nature of the PBC partnership might have played a role in distinguishing the function of posterior versus anterior/central Hox proteins. The basis for this antagonistic function remains enigmatic. It is interesting to note, however, that in the extensive Selex-Seq-based comparative characterisation of Hox monomer versus Hox-*Exd* binding properties, it was found that in the case of the anterior *Lab* and the central *Ubx* proteins, but not the posterior *AbdB* protein, *Exd* promotes the paralogue specialisation of DNA binding properties (Slattery et al., 2011b).

Finally, while the HX has long remained the only well-characterised PBC interaction mode, Hox-PBC interaction is likely to involve greater complexity, which in turn probably contributes to the diversity and specificity of Hox action. A survey of *in vivo* Hox-PBC interactions, covering most *Drosophila* and a few representatives of vertebrate Hox proteins, highlighted that alternatives to HX-mediated PBC interaction are common (Hudry et al., 2012), extending previous observations showing that Exd-dependent function can be achieved by HX-deficient Ubx and AbdA proteins (Galant et al., 2002; Merabet et al., 2003). In addition, although providing insights into how the N-terminal arm of the HD contacts the DNA minor groove (the proximal part of the Hox binding site), the HX interaction mode only provides limited insight into how association with Exd elicits changes occurring in the distal portion of the Hox binding sites (Fig. 4), which are likely to be mediated by the Hox recognition helix (Slattery et al., 2011b).

Studies on *Drosophila* Ubx and AbdA have raised interesting perspectives in this regard. They identified a paralogue-specific protein domain, UbdA, that is located immediately C-terminal to the HD and mediates Exd recruitment (Lelli et al., 2011; Merabet et al., 2007; Saadaoui et al., 2011). This domain folds as a flexible extension of the HD recognition helix and defines Hox-PBC contacts that occur, when compared with those mediated by the HX motif, on the opposing side of the DNA double helix (Foos et al., 2015). This suggests that UbdA-mediated Exd contacts might directly fine-tune the positioning of the recognition helix within the DNA major groove and influence DNA contacts mediated by the distal part of the Hox binding site.

#### Current models for transcription factor function: Hox proteins and beyond

It was initially, and intuitively, assumed that all transcription factors act via a 'surgical' mode of action, binding to a limited number of genomic loci. However, current models of transcription factor function prompt us to reconsider this view. Work on transcription factors encompassing many classes of DNA-binding domains that pattern the early *Drosophila* embryo revealed that transcription factors with well-defined developmental functions show a surprisingly high number of genomic binding sites – up to 20,000 (Li et al., 2008; MacArthur et al., 2009). Even more surprising was the discovery that binding sites for these molecularly distinct transcription factors with diverse biological functions are highly overlapping (MacArthur et al., 2009). This highlights that a binding event is better seen as a probabilistic event, rather than as a qualitative on/off event. Such broad genomic binding is consistent with transcription factor nuclear abundance (Biggin, 2011), which has recently been re-evaluated (Li et al., 2014), and with thermodynamic models of genomic occupancy (Kaplan et al., 2011). Correlative analysis further supports the idea that genomic regions with high/frequent transcription factor occupancy support transcription (MacArthur et al., 2009), whereas regions of low/infrequent transcription factor occupancy have no transcriptional regulatory potential (Fisher et al., 2012). This led to a view of transcription factors acting within the context of a quantitative continua model, in which there are no clear limits between transcriptionally relevant and non-relevant binding events (Biggin, 2011; see below). The qualitative folding of transcription factor complexes might serve, beyond quantitative aspects, to functionally discriminate these binding events.

To ascertain whether the quantitative continua model also applies to Hox proteins, it is necessary to appraise their genomic

distribution. However, data are available in only a few instances: for two *Drosophila* proteins (Dfd and Ubx), three worm proteins (MAB-5, EGL-5 and LIN-39) and for a few vertebrate proteins (Hoxa2, Hoxa9/A9, HOXA13, Hoxb4/B4, Hoxc6/C6, Hoxc9/C9 and HOXD13; Table 1). The number of binding sites for each of these proteins in their respective genomes ranges from 500 to nearly 30,000. Whether these differences relate to intrinsic differences in DNA binding behaviour is difficult to assess, as the data were generated using different methodologies (ChIP-chip, ChIP-Seq) and were analysed using distinct bioinformatic approaches and statistical treatments. In particular, it is difficult to determine the appropriate stringency of analysis to use, especially when considering the recent finding that low-affinity binding sites mediate Ubx function in patterning the larval cuticle (Crocker et al., 2015).

Consideration of the characteristics of the starting biological material is also important when appreciating the significance of the binding events detected. In this context, two features – cellular heterogeneity and the developmental time window covered – are particularly important, and it should be noted that the binding events detected represent a sum of events occurring in different cell types and/or at different time points. Although generally applicable, these limitations hold especially true for Hox proteins, which are known to pattern fields of cells that encompass diverse cell types in a very dynamic manner by regulating distinct sets of target genes at different time points (Fan et al., 2012; Pavlopoulos and Akam, 2011; Sorge et al., 2012), possibly associated with dynamic genome binding (Fan et al., 2012; Niu et al., 2011). With these limitations in mind, and taking into account the often low false discovery rate (FDR) applied, the numbers (see Table 1) seem comparable to those found for other transcription factors, suggesting that Hox DNA binding might also be widespread.

Evaluating the genomic binding ability of Hox proteins also allows comparisons to be made, thereby enabling us to question how distinct the binding properties of different Hox paralogue proteins are and, in the longer term, to assess how evolutionarily conserved these features are. In the case of *Drosophila* Ubx and Dfd (Sorge et al., 2012) it was found that, despite sharing identical DNA binding sequences, the proteins bind to non-overlapping genomic regions, indicating that *in vivo* binding is regulated beyond the intrinsic DNA binding potential of Hox proteins. Thus, at least in this single example, it seems that, although widespread, Hox proteins might not share the overlapping genomic binding property that other transcription factors exhibit (MacArthur et al., 2009).

Another important issue when considering the quantitative continua model is to characterise the relationship between binding events and the transcription of nearby genes. Although transcriptomic data are available for a large number of Hox proteins (as recently summarised by Sanchez-Herrero, 2013), in only a few instances have experiments been conducted on identical or similar biological material allowing genomic and transcriptomic data to be linked (Table 1 and Fig. 5, solid red and green boxes). In all cases, it was found that only a small fraction of binding events are associated with Hox-mediated transcriptional control (Table 1), supporting the quantitative continua model. This conclusion should be taken with caution, however, as dynamic DNA binding might equally account for these observations.

#### Extending the Hox framework: additional transcription factors, chromatin regulators and links to the transcription machinery

Genetic studies in *Drosophila* have identified Exd-independent Hox functions, for example during heart patterning and specification of

**Table 1. Evaluating the genomic binding and gene regulatory effects of Hox proteins**

|             | Genomic binding                                       |                            |                    | Genes regulated                                          |                    | Partners predicted from enriched DNA binding motifs*                                                |
|-------------|-------------------------------------------------------|----------------------------|--------------------|----------------------------------------------------------|--------------------|-----------------------------------------------------------------------------------------------------|
|             | Biological context                                    | Method                     | # peaks            | Biological context                                       | # genes            |                                                                                                     |
| Hoxa2       | Mouse II BA (E11.5) [1]                               | ChIP-Seq                   | 8245               | Mouse II BA (E11.5) [1]                                  | 489                |                                                                                                     |
| Hoxa9/HOXA9 | Mouse haematopoietic cells [2]                        | ChIP-Seq                   | 696                | Rhombomeres (E9.5)                                       | NA/380             | CREB, MYB, CAUDAL, ETS, MYC, STAT                                                                   |
|             | Human leukemic cell lines [3]                         |                            |                    | Human cord blood cells [4]                               | >1981 <sup>‡</sup> |                                                                                                     |
| HOXA13      | Mouse myeloblastic cell line [5]                      | ChIP-Seq                   | 6535               | Mouse HPCs [5]                                           | >76 <sup>§</sup>   | C/EBP $\alpha$                                                                                      |
|             | Bone-tropic human breast cancer cell line [6]         |                            |                    |                                                          | 7132               |                                                                                                     |
| HOXA13      | Mouse embryonic fibroblasts [7]                       | ChIP library               | NA                 | Mouse embryonic fibroblasts [8]                          | 68                 |                                                                                                     |
|             | Human primary fibroblasts [9]                         | ChIP-chip                  | 2903               | Human primary fibroblasts [9]                            | 176                |                                                                                                     |
| Hoxb4/HOXB4 | Human HPC line [10]                                   | ChIP-chip                  | 1910               | Human HPC line [10]                                      | 465                |                                                                                                     |
|             | Mouse ESC-derived HSC/HPC [11]                        | ChIP-chip (promoter array) | 2292               | Mouse ESC-derived HSC/HPC [11]                           | 4555               |                                                                                                     |
| Hoxc6/HOXC6 | Three stages of mouse ESC to HSC differentiation [12] | ChIP-Seq                   | 3632, 7232, 29,313 | Four stages of mouse ESC to HSC differentiation [12]     | 5780               | FLI1, RUNX1, SCL                                                                                    |
|             | Human prostate cancer cell line [13]                  | ChIP-chip (promoter array) | 468                | Adult mouse prostate [13]                                | 1213               |                                                                                                     |
| Hoxc9/HOXC9 | Mouse thoracic spinal cord (E12.5) [14]               | ChIP-Seq                   | NA                 | –                                                        | –                  |                                                                                                     |
|             | Human neuroblastoma cell line [15]                    | ChIP-Seq                   | 29,221             | Human neuroblastoma cell line [15]                       | 2370               |                                                                                                     |
| HOXD13      | Human chondroblast cell line [16]                     | ChIP-chip                  | 248                | –                                                        | –                  |                                                                                                     |
| Dfd         | <i>Drosophila</i> embryo (5-9.5 h) [17]               | ChIP-Seq                   | 1079               | <i>Drosophila</i> embryo (5.5-9.5 h) [18]                | 244                |                                                                                                     |
| Ubx         | <i>Drosophila</i> embryo (0-12 h and 8-12 h) [19]     | ChIP-chip                  | 889                | <i>Drosophila</i> embryo (5.5-9.5 h) [18]                | 213                |                                                                                                     |
|             | <i>Drosophila</i> haltere imaginal disc (L3) [20-22]  | ChIP-chip                  | 519, 4590, 1147    | Genetically modified haltere and wing (Vg, Cbx) [23]     | 202-724            | GAF, MAD, PC, TRX, AEF1, TOP2 [20]; LEF1, STAT1, E2F2, MEF2, IRX2, GRAINYHEAD, GATA, SOX7, TBP [24] |
| MAB-5       | <i>Drosophila</i> leg imaginal disc (L3) [21]         | ChIP-chip                  | 867                | Misexpression in wing [25]                               | 340-1003           | AHR, TEAD1, NF- $\kappa$ B, SMAD3, MAX, SP1, IRX4, BR-C [24]                                        |
|             | <i>Drosophila</i> leg imaginal disc (L3) [21]         | ChIP-chip                  | 867                | Expression in wing and genetically modified haltere [26] | 44-405             |                                                                                                     |
| MAB-5       | <i>C. elegans</i> [27]                                | ChIP-Seq                   | 4493               | –                                                        | –                  |                                                                                                     |
| EGL-5       | <i>C. elegans</i> [27]                                | ChIP-Seq                   | 4688               | –                                                        | –                  |                                                                                                     |
| LIN-39      | <i>C. elegans</i> [27]                                | ChIP-Seq                   | 7493               | –                                                        | –                  |                                                                                                     |

II BA, second branchial arches; ESC, embryonic stem cell; HSC, haematopoietic stem cell; HPC, haematopoietic progenitor cell.

\*TALE co-factors excluded.

<sup>‡</sup>This number corresponds to genes similarly upregulated or downregulated by both HOXA9 and HOXA10.

<sup>§</sup>This number corresponds to genes co-regulated by Hoxa9 and C/EBP $\alpha$ .

References: [1] Donaldson et al. (2012); [2] Huang et al. (2012); [3] Dorsam et al. (2004); [4] Ferrell et al. (2005); [5] Collins et al. (2014); [6] Sun et al. (2013); [7] McCabe and Innis (2005); [8] Williams et al. (2005); [9] Rinn et al. (2008); [10] Lee et al. (2010); [11] Oshima et al. (2011); [12] Fan et al. (2012); [13] McCabe et al. (2008); [14] Jung et al. (2010); [15] Wang et al. (2013); [16] Salsi et al. (2008); [17] Sorge et al. (2012); [18] Hueber et al. (2007); [19] Roy et al. (2010); [20] Agrawal et al. (2011); [21] Slattery et al. (2011a); [22] Choo et al. (2011); [23] Hersh et al. (2007); [24] Slattery et al. (2011a); [25] Pavlopoulos and Akam (2011); [26] Mohit et al. (2006); [27] Niu et al. (2011).

the haltere (Galant et al., 2002; Perrin et al., 2004). Consistent with this, genomic data highlight poor overlap between Ubx and Exd binding events (Nègre et al., 2011), as well as between mouse Hoxa2/Hoxc9 and Pbx1 (Penkov et al., 2013), collectively supporting the idea that Hox proteins can also act without the help of PBC proteins. In line with this, sequence analyses of Hox-

precipitated genomic DNA have identified DNA binding motifs for known transcription factors that thus emerge as potential additional Hox protein partners (Table 1). This provides impetus to extend our view of the architecture of the Hox response element (Mann et al., 2009; Pearson et al., 2005). However, these findings must be correlated with functional studies or proteome-wide interactomic



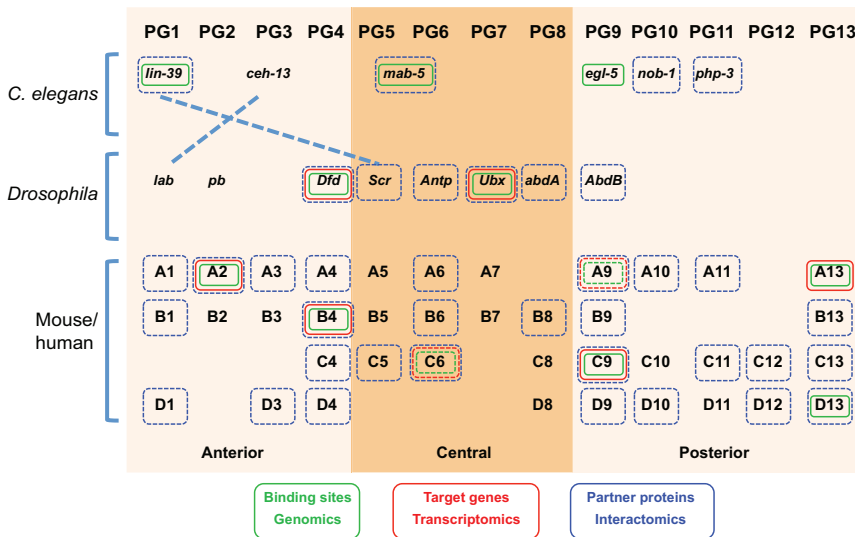

**Fig. 5. An overview of convergent genomic, transcriptomic and proteomic Hox-related data.** Summary of Hox proteins for which whole-genome ChIP (chip library, ChIP-chip or ChIP-Seq; green), transcriptomic (microarray or RNA-Seq; red) and protein-protein interactomic (blue) studies have been performed. Transcriptomic data are only referred to if genomic data for Hox binding are available. Where box lines are solid, this indicates that whole-genome ChIP and transcriptomic data have been generated from biological samples allowing comparisons. Hox genes are arranged as in Fig. 1.

screenings that identify Hox-interacting transcription factors (Bondos et al., 2006; Lambert et al., 2012).

Understanding the function of Hox transcription factors also requires insight into whether they modulate and respond to various features of chromatin. Within the context of the quantitative continua model, the finding that overlapping genomic binding correlates with chromatin accessibility (Li et al., 2011) suggests that such accessibility might explain the genomic distribution of most transcription factors. In addition, predictions of transcription factor genomic binding sites by computational modelling (based on transcription factor nuclear concentration and binding preferences) fit better with actual *in vivo* genomic distributions when chromatin accessibility is taken into account (Kaplan et al., 2011). This view also accommodates the recent discovery of highly occupied target (HOT) regions (Kvon et al., 2012). How the pattern of chromatin accessibility is defined remains to be understood. In one case, that of the regulation of *Dll* by the abdominal Hox proteins Ubx and AbdA, it was shown that Hox proteins modulate chromatin conformation; relaxation of a compacted configuration was found in cells devoid of Ubx and AbdA, which are likely to act by controlling the association of GAGA-associated factor (GAF; also known as Trl) and histone H2Av-containing nucleosomes (Agelopoulos et al., 2012). This suggests a possible role for Hox proteins in defining the chromatin features crucial for gene regulation.

The connection of Hox proteins with chromatin regulators is also supported by a number of other findings. For example, binding motifs for GAF, Trithorax (Trx) and Polycomb group (PcG) proteins are overrepresented in Ubx-precipitated genomic fragments (Agrawal et al., 2011), and that of the CBP/p300 (Crebbp/Ep300) histone acetyltransferase (HAT) is found in Hoxa9 ChIPed fragments (Huang et al., 2012). In addition, a Hoxb1-Pbx-Meis complex plays a role in controlling *hoxb1a* transcription in zebrafish, which was shown to rely on defining the level of histone H4 acetylation by controlling the recruitment of histone deacetylase (HDAC)/CBP at the *hoxb1a* promoter (Choe et al., 2009). Finally, the repressive action that Pbx1 exerts on the osteoblastogenic action of Hoxa10 was shown to involve Runx2 and CBP/p300 recruitment and a decrease in histone H3K9 methylation (Gordon et al., 2011).

Together, the available data indicate that the interplay between Hox proteins and chromatin regulators and features is key to Hox-mediated control of gene regulation. Understanding how diverse this interplay is, how specific it may be for each Hox protein, and

how it contributes to generate specificity in Hox transcriptional responses remains a major challenge for the future.

It is also essential to uncover how Hox proteins interface with the general transcription machinery. Early genetic data identifying mutations in RNA polymerase (Pol) II subunits that phenocopy Ubx haploinsufficiency (Mortin et al., 1992), together with the *in vitro* reconstruction of Ubx transcriptional potential based on S2 or Kc nuclear extracts (Johnson and Krasnow, 1990, 1992), suggested that Ubx might directly interact with general components of the transcription machinery, possibly by regulating assembly of the pre-initiation complex. More recently, additional links have emerged. The HX motif of Antp was shown to establish functional contacts with Bip2 (TAF3), a TATA-binding protein-associated factor (Prince et al., 2008). The Mediator complex, which is a major component of the RNA Pol II machinery, has also been linked to Hox proteins, with Med13 and Med19 subunits being required for proper Hox gene function (Boube et al., 2000, 2014). Direct physical interaction was further identified for Med19, which appears dedicated to gene activation (Boube et al., 2014). The precise contribution of these interactions to transcriptional control by Hox proteins remains to be elucidated.

Mechanistic insight into how Hox proteins control transcription was recently gained by further exploring *hoxb1a* regulation in the zebrafish embryo (Choe et al., 2014). Studying the dynamics of Hoxb1, Pbx and Meis proteins at the *hoxb1a* promoter, it was found that Pbx/Meis association precedes that of Hoxb1b but is insufficient for transcriptional activation, even though RNA Pol II is already recruited. The subsequent recruitment of Hoxb1b releases poised RNA Pol II, allowing efficient transcription. This role in controlling RNA Pol II pausing contrasts with the recognised role for Hox proteins in pre-initiation complex assembly, suggesting that Hox proteins may control several aspects of transcription.

Thus, although we are still in the early stages, functional data allow for a larger framing of Hox protein function. A survey of Hox interactomic data has identified a large number of often as yet unexplored sequence-specific transcription factors, chromatin regulators and components of the general transcription machinery (Fig. 6 and Table 2). This extends the perspectives provided by functional studies and provides ground for more broadly exploring the interplay between Hox proteins and additional transcription factors, as well as their interface with chromatin regulators and the general transcription machinery.

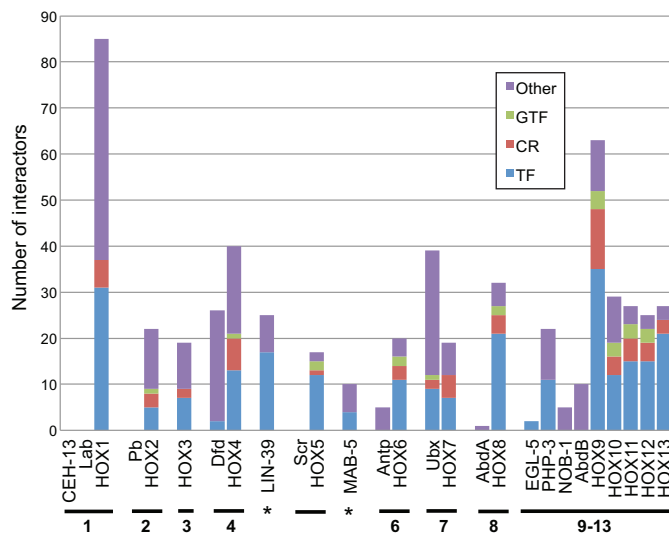

**Fig. 6. An overview of Hox protein interactors.** Data on Hox protein-protein interactions with transcription factors (TF), general transcription factors (GTF; polymerase complex and factors required for transcription initiation), chromatin regulators (CR) and other interactors (other) were collected as described by Rezsóhazy (2014). The Hox PG is indicated beneath, and asterisks indicate Hox proteins that cannot be clearly assigned to one of these groups. For human and mouse, non-redundant interactors have been pooled for both species and PGs.

**Intra-PG comparisons: from functional equivalence to neo- or subfunctionalisation**

The data discussed above provide us with insights into the molecular mechanisms of Hox protein action and highlight that our understanding of these mechanisms is still evolving. However, it is important to try to evaluate the extent to which these molecular insights translate into functional properties. The evolutionary history of Hox genes that yielded the deployment of Hox PGs provides a unique opportunity in that regard. PG proteins that arose following genome duplication display extensive similarity, in particular at the level of their HDs. This led to the assumption that Hox proteins from a given PG could be functionally interchangeable. This indeed appeared to be the case for the Hox PG1 and PG3 genes, where swapping genes or regulatory elements resulted in mice with wild-type phenotypes (Greer et al., 2000; Tvrdik and Capecchi, 2006). Such genetic swapping experiments support the hypothesis that it is actually the expression pattern of the genes, and not the activity of the protein that they encode, that confers specific functions to Hoxa1 and Hoxb1 or to Hoxa3 and Hoxd3.

However, functional equivalence is not always the rule, and Hox paralogues can display subfunctionalisation or neofunctionalisation, each promoting a unique function. The PG5 proteins HOXA5 and HOXB5 nicely illustrate this; whereas HOXA5 has an inhibitory influence on endothelial cell differentiation (Rhoads et al., 2005), its paralogue HOXB5 promotes differentiation from progenitors (Winnik et al., 2009) and stimulates vessel formation and remodelling in a mouse model for vascular occlusion (Fessner et al., 2014). To what extent HOXA5 and HOXB5 oppose each other by differentially controlling common subsets of ‘effector’ or ‘realisator’ genes is yet to be determined, but they both regulate vascular endothelial growth factor receptor 2 (VEGFR2; also known as KDR) (Rhoads et al., 2005; Wu et al., 2003). It is thus tempting to hypothesize that, although these two PG5 proteins display similar, if not identical, DNA recognition specificities, they respond to distinct context-dependent modulations in order to exert opposite activities on target genes.

In some instances, Hox paralogues display mixed behaviour. This is evident in the shared and specific functions of Hox PG9 paralogues during spinal motoneuron specification (Jung et al., 2014). Spinal cord motoneurons are organised into columns and pools, and their specification depends on the activity of Hox genes belonging to PGs 6, 8 and 9, which show mutually repressive activities (Dasen and Jessell, 2009). Hoxc9, in particular, is crucial for specifying motoneurons targeting the thoracic region, and it displays a global repressive activity toward anterior Hox genes (Jung et al., 2010). Each mouse Hox PG9 protein appears to be able to repress Hox genes specifying brachial, upper limb-innervating motoneurons. However, only Hoxa9 and Hoxc9 are able to repress this brachial motoneuron fate properly and promote motoneuron columns involved in thoracic innervation. This means that Hoxa9 and Hoxc9 are functionally equivalent in promoting thoracic motoneuron specification, and also that the shared ability of PG9 Hox proteins to repress ‘brachial’ Hox genes is not sufficient in this respect, such that Hoxb9/d9 are not functionally interchangeable with Hoxa9/c9 in governing motoneuron specification (Jung et al., 2014).

Hoxa2 and Hoxb2 provide an additional example of mixed behaviour. They share the ability to bind and regulate certain target genes and enhancers in the hindbrain (Alexander et al., 2009; Lampe et al., 2008; Matis et al., 2007), but they display opposite activities in regulating oligodendrocyte precursor cells in this territory. Indeed, Hoxa2 has been shown to inhibit whereas Hoxb2 promotes oligodendrogenesis at its early steps. The lack of either Hoxa2 or Hoxb2 therefore results in opposite phenotypes in terms of oligodendrocyte patterning (Miguez et al., 2012). However, to what extent these opposing activities rely on intrinsic and specific properties of Hoxa2 and Hoxb2, or whether it is the rhombomere-specific cell context combined with Hoxa2 versus Hoxb2 expression levels that actually contributes to the differential effect exerted by these proteins on oligodendrogenesis, needs to be investigated further.

The concomitant neo- or subfunctionalisation and functional equivalence shared by PG2 or PG9 genes suggests that the variation in sequence within a PG might be at the origin of protein neo- and subfunctionalisation and that, depending on the context, the same protein may exhibit functional differences. This contextual activity is reminiscent of the latent specificity model, which was proposed to account for the binding selectivity elicited through interaction with Exd in an *in vitro* Selex-Seq setting (Slattery et al., 2011b). This model proposes that, whereas Hox proteins acting alone have little specificity, interaction with Exd unveils latent intrinsic Hox specificity. In the case of paralogous Hox protein functions, it then suggests that divergence alone between paralogous Hox proteins is insufficient to make them functionally different, but that association with other proteins might unveil latent functional differences that then result in neo- or subfunctionalisation.

**Conclusions**

Examining Hox protein function at both a cellular and molecular scale allows us to draw interesting correlations between the molecular modalities of Hox proteins and their functional properties during development. This certainly suggests that we are on the correct track to decipher principles and mechanisms beyond the specific and diverse functions that Hox proteins perform. It is also clear that large-scale genomic, transcriptomic and proteomic/interactomic approaches can provide further insights into Hox protein functions and modes of action. However, our current genomic and transcriptomic view is restricted to just a few Hox proteins, and the available data can only rarely be reliably integrated

**Table 2. Hox-interacting proteins**

|       | Transcription factors                                                                                                                                                                                                                            | Chromatin regulators                                                                   | General transcription factors   | Other interactors                                                                                                                                                                                                                                                                                                                                                                          |
|-------|--------------------------------------------------------------------------------------------------------------------------------------------------------------------------------------------------------------------------------------------------|----------------------------------------------------------------------------------------|---------------------------------|--------------------------------------------------------------------------------------------------------------------------------------------------------------------------------------------------------------------------------------------------------------------------------------------------------------------------------------------------------------------------------------------|
| HOX1  | FHL5, GRN, HMGB1, HOXA1, HOXB1, HOXC9, HOXD3, HSFY1, IKZF2, LDB1, LPXN, MDF1, MEIS1, N4BP2L2, NR3C1, NR4A1, OGT, PAX6, PAX9, PBX1, PITX2, PKNOX1, PKNOX2, PLSRC, PLSRC2, RBC1, TCF3, TRIP6, ZBTB16, ZBTB32, ZZZ3                                 | KDM1A, KDM5, PRMT6, SUV39H1, CREBBP, EP300                                             |                                 | ABHD17A, ADAMTSL4, ADCK4, AGPAT1, BSCL2, C1ORF94, CCDC33, CERS2, CHIC2, COX1, CRACR2A, DKKL1, DUSP22, EFEMP2, FAM154A, GP9, GPRIN2, HSD3B7, KRT81, KRTAP26-1, KRTAP3-2, KRTAP3-3, KRTAP4-12, KRTAP5-9, LGALS13, LIMS1, LNX2, MGAT5B, PCSK5, PDCD6IP, PDLIM7, PFKM, PIK3R1, PRNP, PRRC2B, RAB33A, RBPMS, RGS17, RGS20, SERPINA3, SIRT1, SMOC1, SPRY1, SPRY2, TRAF1, TRAF2, TRAPPC6A, TRIM23 |
| HOX2  | CHD4, LFI205B, MEIS1, RBM39, TLE6                                                                                                                                                                                                                | BRCA1, CREBBP, EP300                                                                   | CIITA                           | ASB12, CERS2, ERCC8, MNDA, PSMA3, PSMB2, RAI14, RCHY1, SOD1, YBX3, ZDHHC16, ZDHHC6                                                                                                                                                                                                                                                                                                         |
| HOX3  | ALX4, E2F4, HMGB1, HOXA1, MEOX2, SOX10, TLE6                                                                                                                                                                                                     | CREBBP, EP300                                                                          |                                 | CERS2, CSDE1, DDB1, POT1, PWP1, SEC23B, TERF1, TINF2, ZDHHC17, YWHAE                                                                                                                                                                                                                                                                                                                       |
| HOX4  | ALX4, ETV4, HOXB13, MEIS1, NFE2, PBX1, PBX3, POU2F1, SALL4, SNAI1, SOX10, SOX8, ZBTB32                                                                                                                                                           | CREBBP, EP300, PRMT5, PRMT6, SUV39H1, WHSC1L1, ZMYND11                                 | POLR2I                          | ASB8, CNOT7, CUL4A, DDB1, ELMOD2, HIPK1, HNRNPAB, HTT, LYN, PRKDC, RBX1, RNF32, RNPS1, RXRG, TIGD4, XRCC5, XRCC6, XRCC6, ZSCAN18                                                                                                                                                                                                                                                           |
| HOX5  | CDX4, DDIT3, FOXA2, FOXO1, MEIS1, MYC, PBX1, PBX3, SMAD1, SOX2, TWIST1, ZNF408                                                                                                                                                                   | PRMT6                                                                                  | GTF2A1L, POLR2I                 | UBC, YWHAE                                                                                                                                                                                                                                                                                                                                                                                 |
| HOX6  | ALX4, HMGB1, HOXB7, NRF1, PBX1, PBX3, PKNOX2, PLSRC1, POU2F1, TCF21, TSC22D3                                                                                                                                                                     | APP, CREBBP, EP300                                                                     | POLR2I, TCEAL1                  | CSNK2B, KRT15, SAT1, UBC                                                                                                                                                                                                                                                                                                                                                                   |
| HOX7  | HOXB6, JUNB, MEIS1, NFKBIA, NPM1, PBX1, PKNOX                                                                                                                                                                                                    | APP, CREBBP, EP300, PARP1, GMNN                                                        |                                 | CSNK2A1, IRAK3, PEX5, PRKDC, UBC, XRCC5, XRCC6                                                                                                                                                                                                                                                                                                                                             |
| HOX8  | DLX2, DLX5, EYA3, HMGB1, HOMEZ, IRF7, IRF9, JUN, MEIS1, MSX1, NR3C1, PBX1, PBX2, PBX3, POU2F1, SMAD1, SMAD4, SMAD6, STAT5B, TSC22D3, ZFP30                                                                                                       | BTG2, GMNN, KMT2A, RCC1                                                                | GTF2A1L, POLR2J                 | ANXA7, ASB1, CDKN1A, HCVGP1, PFDN1                                                                                                                                                                                                                                                                                                                                                         |
| HOX9  | BARX1, ETV5, HMGB1, HOPX, HOXC13, HOXC9, HOXD1, HOXD9, IRF9, JUN, MDF1, MEIS1, MEIS2, MYBBP1A, NFKBIA, NKX2-1, NMI, PAX6, PBX1, PBX2, PBX3, PHTF1, PKNOX1, PLSRC1, POU2F1, SMAD2, SMAD4, SOX15, SPZ1, TAL1, TRIP6, ZFP292, ZFP36, ZNF384, ZNF408 | BTG1, BTG2, CBX6, CREBBP, EP300, GMNN, HDAC12, ING4, KMT2A, PCGF2, PHF17, PRMT5, SUZ12 | GTF2A1L, POLR2D, POLR2I, POLR3D | CUL4A, ECT2, ELAVL2, FAIM3, GORAB, KRTAP4-12, RBPMS, SAT1, UBC, LZTS2, PTBP3                                                                                                                                                                                                                                                                                                               |
| HOX10 | ALX4, EMX1, FOXO1, HMGB1, HOXA10, MEIS1, MYC, PBX1, PBX2, PBX3, SPI1, ZFP292                                                                                                                                                                     | CREBBP, EP300, GMNN, SIRT2                                                             | POLR3D, SNAPC1, TCEB2           | CDC27, COPS5, CWC27, EGFR, NUP205, PTPN11, PTPN6, SUMO2, UBC, YWHAG                                                                                                                                                                                                                                                                                                                        |
| HOX11 | ALX4, FOXO1, HMGB1, HMGXB3, HR, IRF4, MEIS1, PGBD3, SMAD3, SOX8, SP1, STAT3, TBX21, YY1, ZFP292                                                                                                                                                  | CREBBP, GMNN, HDAC1, HDAC2, HDAC5                                                      | GTF2A1TL, GTF2H1, POLR2I        | CD2AP, ELAVL1, HTT, UBC                                                                                                                                                                                                                                                                                                                                                                    |
| HOX12 | ALX4, JUN, MAF, MAFB, MAFF, MAFG, MAFK, MEIS1, NKX2-1, PAX6, PBX1, PBX2, PBX3, POU6F1, ZFP292                                                                                                                                                    | BRCA1, CREBBP, JADE1, RFXANK                                                           | GTF2A1L, POLR2I, TAF13          | COPS2, RNPS1, WWP1                                                                                                                                                                                                                                                                                                                                                                         |
| HOX13 | ALX4, DLX1, DLX5, ELF1, ELK1, HAND2, HOXC9, HOXD4, IRF4, MEIS1, MEIS2, MEIS3, NR2E3, OTX2, POU2F1, RHOF2, SMAD1, SMAD2, SMAD5, SOX5, ZNF490                                                                                                      | CREBBP, EED, RNF2                                                                      |                                 | UBC, APEX1, HNRNPAB                                                                                                                                                                                                                                                                                                                                                                        |

Continued

Table 2. Continued

|                | Transcription factors                                                                                                       | Chromatin regulators | General transcription factors | Other interactors                                                                                                                                                                                                      |
|----------------|-----------------------------------------------------------------------------------------------------------------------------|----------------------|-------------------------------|------------------------------------------------------------------------------------------------------------------------------------------------------------------------------------------------------------------------|
| DFD            | ASE, BCD                                                                                                                    |                      |                               | ALD, CDC2C, CDK4, CDK5, CG13996, CG15140, CG1812, CG3748, CG4078, CG8128, CG9527, CKS85A, CUL-3, CYCG, KP78B, MAD2, ORB2, ORC4, PGAP5, PNG, POLO, RECQ4, RUX, TRIP1                                                    |
| ANTP           |                                                                                                                             |                      |                               | CG15120, CG16985, CG4623, CPR73D, ZASP66                                                                                                                                                                               |
| UBX            | AL, ALY, APT, ARM, CYCK, H, NOC, SMOX, ZF30C                                                                                | DMI-2, DIP1          | TFIIB                         | 14-3-3 $\epsilon$ , BRD, CBP80, CG11164, CG13474, CG6455, CYCK, DSH, EF1 $\gamma$ , EF2, FZO, GLYP, HSC70-4, MRPL44, MS(3)76CC, NMO, NRT, OTU, P120CTN, PK17E, RAD23, REF1, RPL22, RPN6, RPS13, TERM, TRN, YURI, ZN72D |
| ABDA<br>ABDB   |                                                                                                                             |                      |                               | CYCG<br>CDA5, CG13728, CG1486, CSN6, EF2B, GINT3, GKT, PK17E, PXB, RPS12                                                                                                                                               |
| LIN-39         | PAX-3, CEH-27, CEH-51, DMD-8, EFL2, FKH-6, HLH-26, KLF-2, MED-2, NHR-67, POP-1, SPE-44, TAB-1, TBX-9, ZIP-10, ZLF-16, ZLF-2 |                      |                               | DHS-14, F53F1.4, K10D6.4, O44719_CAEEL, Q21423_CAEEL, Q22826_CAEEL, Q9XVM6_CAEEL, RAD26                                                                                                                                |
| MAB-5          | CEH-23, ELF-1, EYA-1, ZLF-16                                                                                                |                      |                               | C34B2.4, DSH-2, F5GU47_CAEEL, O01527_CAEEL, O44949_CAEEL, YQJ3_CAEEL                                                                                                                                                   |
| EGL-5<br>PHP-3 | EGL-5, POP-1<br>CEH-51, CRTC-1, EFL-2, FKH-2, FKH-6, KLF-2, LIN-48, MDT-17, NHR-47, SPE-44, UNC-86                          |                      |                               | CELE_F47G4.4, CCCH-2, GCN-2, GIPC-1, GST-7, LGC-37, PEPT-3, PIK-1, PSR-1, Q965P0_CAEEL, RPS-10, VAV-1                                                                                                                  |
| NOB-1          |                                                                                                                             |                      |                               | F57G12.2, ACT-5, ICD-1, RPL-17, RPL-18                                                                                                                                                                                 |

Data on Hox protein-protein interactions with transcription factors, general transcription factors, chromatin regulators and other interactors were collected from protein interaction databases as described by Rezsóhazy (2014).

into a biologically relevant picture, as data most often concern different cellular material and developmental stages. Expanding the realm of large-scale genomic and transcriptomic data is thus essential, and will be of maximum benefit if generated in a manner that will optimise cross-comparisons.

Besides specific functions, evidence is now also emerging that proteins from distinct PGs can perform similar or even identical functions. This is illustrated in *Drosophila* by the inhibition of autophagy that is driven similarly by most *Drosophila* Hox proteins (Banreti et al., 2014) and by the repression of the limb-promoting gene *Dll* by the Ubx, AbdA and posterior AbdB central proteins (Sambrani et al., 2013). Similar situations exist in vertebrates too: the functional equivalence of Hox5-8, which converge in specifying brachial motoneurons in the mouse spinal cord (Lacombe et al., 2013); the promotion of haematopoietic stem and progenitor cell expansion and inhibition of differentiation by Hoxb3, Hoxb4/B4 and Hoxb6 (reviewed by Alharbi et al., 2013); and the control of embryo implantation in mammals by HOXA9-11 and HOXD10 (Lu et al., 2008; Xu et al., 2014). It is tempting to speculate that such generic Hox functions might result from non-discriminative modes of action, consistent with widespread Hox genomic DNA binding, possibly without or with limited help from assisting protein partners. These generic functions might alternatively be seen as the result of functional convergence arising from distinct molecular modalities. Although less intuitive, this is supported by cooperative versus antagonistic partnership

with Exd for Ubx- and AbdB-mediated repression of *Dll* (Sambrani et al., 2013). Investigating more broadly and understanding the molecular modalities of such generic Hox functions is an important objective and should uncover novel aspects of Hox protein modes of action.

There is also much to be learned from considering Hox protein function within a larger framework, including a wider partnering potential with other sequence-specific transcription factors, the general transcription machinery and chromatin regulators. It will also be crucial to investigate possible links between Hox proteins and the nuclear architecture, which is known to impact transcriptional regulation (Schneider and Grosschedl, 2007). Proteomic/interactomic data are available for a set of Hox proteins, but candidate Hox partnerships can rarely be traced back to specific cellular and developmental contexts. The full potential of these data will only be grasped once the functional relevance of protein-protein physical associations have been established. This will also clarify how such partnerships contribute to functional versatility, and how versatility in Hox protein function relates to cellular contexts. Integrating such large-scale data sets will be essential for determining whether the prevailing concepts and mechanisms are sufficient to explain the many facets of Hox protein function.

#### Acknowledgements

We apologise to the authors of primary research work that could not be cited owing to space limitation.

**Competing interests**

The authors declare no competing or financial interests.

**Funding**

Work in the Y.G. laboratory is supported by the Centre National de la Recherche Scientifique (CNRS), Aix Marseille Université (AMU), Agence Nationale de la Recherche (ANR), Centre Franco-Indien pour la Promotion de la Recherche Avancée (CEFIPRA), ARC and the A\*MIDEX project [ANR-11-IDEX-0001-02]. Work in the R.R. laboratory is supported by Fonds National de la Recherche Scientifique (FNRS, FRIA grants), an Action de Recherche Concertée [ARC grant 12/17-041], Fonds Spéciaux de Recherche (FSR, Université Catholique de Louvain) and the Belgian Foundation Against Cancer.

**References**

- Agelopoulos, M., McKay, D. J. and Mann, R. S.** (2012). Developmental regulation of chromatin conformation by Hox proteins in *Drosophila*. *Cell Rep.* **1**, 350-359.
- Agrawal, P., Habib, F., Yelagandula, R. and Shashidhara, L. S.** (2011). Genome-level identification of targets of Hox protein Ultrathorax in *Drosophila*: novel mechanisms for target selection. *Sci. Rep.* **1**, 205.
- Alexander, T., Nolte, C. and Krumlauf, R.** (2009). Hox genes and segmentation of the hindbrain and axial skeleton. *Annu. Rev. Cell Dev. Biol.* **25**, 431-456.
- Alharbi, R. A., Pettengell, R., Pandha, H. S. and Morgan, R.** (2013). The role of HOX genes in normal hematopoiesis and acute leukemia. *Leukemia* **27**, 1000-1008.
- Amin, S., Donaldson, I. J., Zannino, D. A., Hensman, J., Rattray, M., Losa, M., Spitz, F., Ladam, F., Sagerstrom, C. and Bobola, N.** (2015). Hoxa2 selectively enhances Meis binding to change a branchial arch ground state. *Dev. Cell* **32**, 265-277.
- Amores, A., Suzuki, T., Yan, Y.-L., Pomeroy, J., Singer, A., Amemiya, C. and Postlethwait, J. H.** (2004). Developmental roles of pufferfish Hox clusters and genome evolution in ray-fish. *Genome Res.* **14**, 1-10.
- Aubin, J., Dery, U., Lemieux, M., Chailier, P. and Jeannotte, L.** (2002). Stomach regional specification requires Hoxa5-driven mesenchymal-epithelial signaling. *Development* **129**, 4075-4087.
- Bach, C., Buhl, S., Mueller, D., Garcia-Cuellar, M. P., Maethner, E. and Slany, R. K.** (2010). Leukemogenic transformation by HOXA cluster genes. *Blood* **115**, 2910-2918.
- Banreti, A., Hudry, B., Sass, M., Saurin, A. J. and Graba, Y.** (2014). Hox proteins mediate developmental and environmental control of autophagy. *Dev. Cell* **28**, 56-69.
- Baumgardt, M., Karlsson, D., Salmani, B. Y., Bivik, C., MacDonald, R. B., Gunnar, E. and Thor, S.** (2014). Global programmed switch in neural daughter cell proliferation mode triggered by a temporal gene cascade. *Dev. Cell* **30**, 192-208.
- Bei, L., Lu, Y., Bellis, S. L., Zhou, W., Horvath, E. and Eklund, E. A.** (2007). Identification of a HoxA10 activation domain necessary for transcription of the gene encoding beta3 integrin during myeloid differentiation. *J. Biol. Chem.* **282**, 16846-16859.
- Berger, M. F., Badis, G., Gehrke, A. R., Talukder, S., Philippakis, A. A., Peña-Castillo, L., Alleyne, T. M., Mnaimneh, S., Botvinnik, O. B., Chan, E. T. et al.** (2008). Variation in homeodomain DNA binding revealed by high-resolution analysis of sequence preferences. *Cell* **133**, 1266-1276.
- Bergiers, I., Bridoux, L., Nguyen, N., Twizere, J.-C. and Rezsöházy, R.** (2013). The homeodomain transcription factor Hoxa2 interacts with and promotes the proteasomal degradation of the E3 ubiquitin protein ligase RCHY1. *PLoS ONE* **8**, e80387.
- Berry, M. and Gehring, W.** (2000). Phosphorylation status of the SCR homeodomain determines its functional activity: essential role for protein phosphatase 2A,B'. *EMBO J.* **19**, 2946-2957.
- Biggin, M. D.** (2011). Animal transcription networks as highly connected, quantitative continua. *Dev. Cell* **21**, 611-626.
- Bondos, S. E., Tan, X.-X. and Matthews, K. S.** (2006). Physical and genetic interactions link hox function with diverse transcription factors and cell signaling proteins. *Mol. Cell. Proteomics* **5**, 824-834.
- Boube, M., Faucher, C., Joulia, L., Cribbs, D. L. and Bourbon, H.-M.** (2000). *Drosophila* homologs of transcriptional mediator complex subunits are required for adult cell and segment identity specification. *Genes Dev.* **14**, 2906-2917.
- Boube, M., Hudry, B., Immarigeon, C., Carrier, Y., Bernat-Fabre, S., Merabet, S., Graba, Y., Bourbon, H.-M. and Cribbs, D. L.** (2014). *Drosophila* melanogaster Hox transcription factors access the RNA polymerase II machinery through direct homeodomain binding to a conserved motif of mediator subunit Med19. *PLoS Genet.* **10**, e1004303.
- Boucherat, O., Chakir, J. and Jeannotte, L.** (2012). The loss of Hoxa5 function promotes Notch-dependent goblet cell metaplasia in lung airways. *Biol. Open* **1**, 677-691.
- Breau, M. A., Wilkinson, D. G. and Xu, Q.** (2013). A Hox gene controls lateral line cell migration by regulating chemokine receptor expression downstream of Wnt signaling. *Proc. Natl. Acad. Sci. USA* **110**, 16892-16897.
- Bürglin, T. R.** (1998). The PBC domain contains a MEINOX domain: coevolution of Hox and TALE homeobox genes? *Dev. Genes Evol.* **208**, 113-116.
- Castelli Gair Hombria, J., Rivas, M. L. and Sotillos, S.** (2009). Genetic control of morphogenesis - Hox induced organogenesis of the posterior spiracles. *Int. J. Dev. Biol.* **53**, 1349-1358.
- Cerdá-Esteban, N. and Spagnoli, F. M.** (2014). Glimpse into Hox and TALE regulation of cell differentiation and reprogramming. *Dev. Dyn.* **243**, 76-87.
- Chan, S.-K., Jaffe, L., Capovilla, M., Botas, J. and Mann, R. S.** (1994). The DNA binding specificity of Ultrathorax is modulated by cooperative interactions with extradenticle, another homeoprotein. *Cell* **78**, 603-615.
- Chan, S.-K., Pöppel, H., Krumlauf, R. and Mann, R. S.** (1996). An extradenticle-induced conformational change in a HOX protein overcomes an inhibitory function of the conserved hexapeptide motif. *EMBO J.* **15**, 2476-2487.
- Chan, S. K., Ryoo, H. D., Gould, A., Krumlauf, R. and Mann, R. S.** (1997). Switching the in vivo specificity of a minimal Hox-responsive element. *Development* **124**, 2007-2014.
- Chen, F. and Capecchi, M. R.** (1999). Paralogous mouse Hox genes, Hoxa9, Hoxb9, and Hoxd9, function together to control development of the mammary gland in response to pregnancy. *Proc. Natl. Acad. Sci. USA* **96**, 541-546.
- Chen, H., Chung, S. and Sukumar, S.** (2004). HOXA5-induced apoptosis in breast cancer cells is mediated by caspases 2 and 8. *Mol. Cell. Biol.* **24**, 924-935.
- Choe, S.-K., Lu, P., Nakamura, M., Lee, J. and Sagerström, C. G.** (2009). Meis cofactors control HDAC and CBP accessibility at Hox-regulated promoters during zebrafish embryogenesis. *Dev. Cell* **17**, 561-567.
- Choe, S.-K., Ladam, F. and Sagerström, C. G.** (2014). TALE factors poise promoters for activation by Hox proteins. *Dev. Cell* **28**, 203-211.
- Choo, S. W. and Russell, S.** (2011). Genomic approaches to understanding Hox gene function. *Adv. Genet.* **76**, 55-91.
- Choo, S. W., White, R. and Russell, S.** (2011). Genome-wide analysis of the binding of the Hox protein Ultrathorax and the Hox cofactor Homothorax in *Drosophila*. *PLoS ONE* **6**, e14778.
- Collins, C., Wang, J., Miao, H., Bronstein, J., Nower, H., Xu, T., Figueroa, M., Muntean, A. G. and Hess, J. L.** (2014). C/EBPalpha is an essential collaborator in Hoxa9/Meis1-mediated leukemogenesis. *Proc. Natl. Acad. Sci. USA* **111**, 9899-9904.
- Comelli, L., Marchetti, L., Arosio, D., Riva, S., Abdurashidova, G., Beltram, F. and Falaschi, A.** (2009). The homeotic protein HOXC13 is a member of human DNA replication complexes. *Cell Cycle* **8**, 454-459.
- Crocker, J., Abe, N., Rinaldi, L., McGregor, A. P., Frankel, N., Wang, S., Alsavadi, A., Valenti, P., Plaza, S., Payre, F. et al.** (2015). Low affinity binding site clusters confer hox specificity and regulatory robustness. *Cell* **160**, 191-203.
- Dasen, J. S. and Jessell, T. M.** (2009). Hox networks and the origins of motor neuron diversity. *Curr. Top. Dev. Biol.* **88**, 169-200.
- Di Bonito, M., Narita, Y., Avallone, B., Sequino, L., Mancuso, M., Andolfi, G., Franzè, A. M., Puelles, L., Rijli, F. M. and Studer, M.** (2013). Assembly of the auditory circuitry by a Hox genetic network in the mouse brainstem. *PLoS Genet.* **9**, e1003249.
- Di Meglio, T., Kratochwil, C. F., Vilain, N., Loche, A., Vitobello, A., Yonehara, K., Hrycaj, S. M., Roska, B., Peters, A. H. F. M., Eichmann, A. et al.** (2013). Ezh2 orchestrates topographic migration and connectivity of mouse precerebellar neurons. *Science* **339**, 204-207.
- Di-Poi, N., Zákány, J. and Duboule, D.** (2007). Distinct roles and regulations for HoxD genes in metanephric kidney development. *PLoS Genet.* **3**, e232.
- Donaldson, I. J., Amin, S., Hensman, J. J., Kutejova, E., Rattray, M., Lawrence, N., Hayes, A., Ward, C. M. and Bobola, N.** (2012). Genome-wide occupancy links Hoxa2 to Wnt-beta-catenin signaling in mouse embryonic development. *Nucleic Acids Res.* **40**, 3990-4001.
- Dorsam, S. T., Ferrell, C. M., Dorsam, G. P., Derynck, M. K., Vijapurkar, U., Khodabakhsh, D., Pau, B., Bernstein, H., Haqq, C. M., Largman, C. et al.** (2004). The transcriptome of the leukemogenic homeoprotein HOXA9 in human hematopoietic cells. *Blood* **103**, 1676-1684.
- Duboule, D.** (2007). The rise and fall of Hox gene clusters. *Development* **134**, 2549-2560.
- Ebner, A., Cabernard, C., Affolter, M. and Merabet, S.** (2005). Recognition of distinct target sites by a unique Labial/Extradenticle/Homothorax complex. *Development* **132**, 1591-1600.
- Eklund, E. A., Goldenberg, I., Lu, Y., Andrejic, J. and Kakar, R.** (2002). SHP1 protein-tyrosine phosphatase regulates HoxA10 DNA binding and transcriptional repression activity in undifferentiated myeloid cells. *J. Biol. Chem.* **277**, 36878-36888.
- Fan, R., Bonde, S., Gao, P., Sotomayor, B., Chen, C., Mouw, T., Zavazava, N. and Tan, K.** (2012). Dynamic HoxB4-regulatory network during embryonic stem cell differentiation to hematopoietic cells. *Blood* **119**, e139-e147.
- Ferrell, C. M., Dorsam, S. T., Ohta, H., Humphries, R. K., Derynck, M. K., Haqq, C., Largman, C. and Lawrence, H. J.** (2005). Activation of stem-cell specific genes by HOXA9 and HOXA10 homeodomain proteins in CD34+ human cord blood cells. *Stem Cells* **23**, 644-655.
- Fessner, A., Esser, J. S., Bluhm, F., Grundmann, S., Zhou, Q., Patterson, C., Bode, C. and Moser, M.** (2014). The transcription factor HoxB5 stimulates

- vascular remodelling in a cytokine-dependent manner. *Cardiovasc. Res.* **101**, 247-255.
- Fisher, W. W., Li, J. J., Hammonds, A. S., Brown, J. B., Pfeiffer, B. D., Weiszmann, R., MacArthur, S., Thomas, S., Stamatoyannopoulos, J. A., Eisen, M. B. et al. (2012). DNA regions bound at low occupancy by transcription factors do not drive patterned reporter gene expression in *Drosophila*. *Proc. Natl. Acad. Sci. USA* **109**, 21330-21335.
- Foos, N., Maurel-Zaffran, C., Jesús Maté, M., Vincentelli, R., Hainaut, M., Berenger, H., Pradel, J., Saurin, A. J., Ortiz-Lombardía, M. and Graba, Y. (2015). A flexible extension of the *Drosophila* Ultrabithorax homeodomain defines a novel Hox/PBC interaction mode. *Structure* **23**, 270-279.
- Gabellini, D., Colaluca, I. N., Vodermaier, H. C., Biamonti, G., Giacca, M., Falaschi, A., Riva, S. and Peverali, F. A. (2003). Early mitotic degradation of the homeoprotein HOXC10 is potentially linked to cell cycle progression. *EMBO J.* **22**, 3715-3724.
- Galant, R. and Carroll, S. B. (2002). Evolution of a transcriptional repression domain in an insect Hox protein. *Nature* **415**, 910-913.
- Galant, R., Walsh, C. M. and Carroll, S. B. (2002). Hox repression of a target gene: extradenticle-independent, additive action through multiple monomer binding sites. *Development* **129**, 3115-3126.
- García-Fernández, J. (2005). The genesis and evolution of homeobox gene clusters. *Nat. Rev. Genet.* **6**, 881-892.
- Garin, É., Lemieux, M., Coulombe, Y., Robinson, G. W. and Jeannotte, L. (2006). Stromal Hoxa5 function controls the growth and differentiation of mammary alveolar epithelium. *Dev. Dyn.* **235**, 1858-1871.
- Gavalas, A., Davenne, M., Lumsden, A., Chambon, P. and Rijli, F. M. (1997). Role of Hoxa-2 in axon pathfinding and rostral hindbrain patterning. *Development* **124**, 3693-3702.
- Gavis, E. R. and Hogness, D. S. (1991). Phosphorylation, expression and function of the Ultrabithorax protein family in *Drosophila melanogaster*. *Development* **112**, 1077-1093.
- Gehring, W. J., Qian, Y. Q., Billeter, M., Furukubo-Tokunaga, K., Schier, A. F., Resendez-Perez, D., Affolter, M., Otting, G. and Wüthrich, K. (1994). Homeodomain-DNA recognition. *Cell* **78**, 211-223.
- Geisen, M. J., Di Meglio, T., Pasqualetti, M., Ducret, S., Brunet, J.-F., Chedotal, A. and Rijli, F. M. (2008). Hox paralog group 2 genes control the migration of mouse pontine neurons through slit-robo signaling. *PLoS Biol.* **6**, e142.
- Gellon, G. and McGinnis, W. (1998). Shaping animal body plans in development and evolution by modulation of Hox expression patterns. *Bioessays* **20**, 116-125.
- Gilbert, P. M., Mouw, J. K., Unger, M. A., Lakins, J. N., Beggnon, M. K., Clemmer, V. B., Benezra, M., Licht, J. D., Boudreau, N. J., Tsai, K. K. C. et al. (2010). HOXA9 regulates BRCA1 expression to modulate human breast tumor phenotype. *J. Clin. Invest.* **120**, 1535-1550.
- Godwin, A. R. and Capecchi, M. R. (1998). Hoxc13 mutant mice lack external hair. *Genes Dev.* **12**, 11-20.
- González-Martín, M. C., Mallo, M. and Ros, M. A. (2014). Long bone development requires a threshold of Hox function. *Dev. Biol.* **392**, 454-465.
- Gordon, J. A. R., Hassan, M. Q., Koss, M., Montecino, M., Selli, L., van Wijnen, A. J., Stein, J. L., Stein, G. S. and Lian, J. B. (2011). Epigenetic regulation of early osteogenesis and mineralized tissue formation by a HOXA10-PBX1-associated complex. *Cells Tissues Organs* **194**, 146-150.
- Graba, Y., Aragnot, D., Laurenti, P., Garzino, V., Charnot, D., Berenger, H. and Pradel, J. (1992). Homeotic control in *Drosophila*; the scabrous gene is an in vivo target of Ultrabithorax proteins. *EMBO J.* **11**, 3375-3384.
- Greer, J. M., Puetz, J., Thomas, K. R. and Capecchi, M. R. (2000). Maintenance of functional equivalence during paralogous Hox gene evolution. *Nature* **403**, 661-665.
- Grieder, N. C., Marty, T., Ryoo, H.-D., Mann, R. S. and Affolter, M. (1997). Synergistic activation of a *Drosophila* enhancer by HOM/EXD and DPP signaling. *EMBO J.* **16**, 7402-7410.
- Hamid, S. M., Cicek, S., Karamil, S., Ozturk, M. B., Debelec-Butuner, B., Erbaykent-Tepedelen, B., Varisli, L., Gonen-Korkmaz, C., Yorukoglu, K. and Korkmaz, K. S. (2014). HOXB13 contributes to G1/S and G2/M checkpoint controls in prostate. *Mol. Cell. Endocrinol.* **383**, 38-47.
- Hassan, M. Q., Tare, R., Lee, S. H., Mandeville, M., Weiner, B., Montecino, M., van Wijnen, A. J., Stein, J. L., Stein, G. S. and Lian, J. B. (2007). HOXA10 controls osteoblastogenesis by directly activating bone regulatory and phenotypic genes. *Mol. Cell. Biol.* **27**, 3337-3352.
- Hayashi, S. and Scott, M. P. (1990). What determines the specificity of action of *Drosophila* homeodomain proteins? *Cell* **63**, 883-894.
- Hersh, B. M., Nelson, C. E., Stoll, S. J., Norton, J. E., Albert, T. J. and Carroll, S. B. (2007). The UBX-regulated network in the haltere imaginal disc of *D. melanogaster*. *Dev. Biol.* **302**, 717-727.
- Hombria, J. C.-G. and Lovegrove, B. (2003). Beyond homeosis—HOX function in morphogenesis and organogenesis. *Differentiation* **71**, 461-476.
- Huang, Y., Sitwala, K., Bronstein, J., Sanders, D., Dandekar, M., Collins, C., Robertson, G., MacDonald, J., Cezard, T., Bilenky, M. et al. (2012). Identification and characterization of Hoxa9 binding sites in hematopoietic cells. *Blood* **119**, 388-398.
- Hudry, B., Remacle, S., Delfini, M.-C., Rezsöházy, R., Graba, Y. and Merabet, S. (2012). Hox proteins display a common and ancestral ability to diversify their interaction mode with the PBC class cofactors. *PLoS Biol.* **10**, e1001351.
- Hueber, S. D., Bezdán, D., Henz, S. R., Blank, M., Wu, H. and Lohmann, I. (2007). Comparative analysis of Hox downstream genes in *Drosophila*. *Development* **134**, 381-392.
- Iimura, T. and Pourquié, O. (2006). Collinear activation of Hoxb genes during gastrulation is linked to mesoderm cell ingression. *Nature* **442**, 568-571.
- Jackson, M., Axton, R. A., Taylor, A. H., Wilson, J. A., Gordon-Keylock, S. A. M., Kokkaliaris, K. D., Brickman, J. M., Schulz, H., Hummel, O., Hubner, N. et al. (2012). HOXB4 can enhance the differentiation of embryonic stem cells by modulating the hematopoietic niche. *Stem Cells* **30**, 150-160.
- Jaffe, L., Ryoo, H. D. and Mann, R. S. (1997). A role for phosphorylation by casein kinase II in modulating Antennapedia activity in *Drosophila*. *Genes Dev.* **11**, 1327-1340.
- Johansson, J. A. and Headon, D. J. (2014). Regionalisation of the skin. *Semin. Cell Dev. Biol.* **25-26**, 3-10.
- Johnson, F. B. and Krasnow, M. A. (1990). Stimulation of transcription by an Ultrabithorax protein in vitro. *Genes Dev.* **4**, 1044-1052.
- Johnson, F. B. and Krasnow, M. A. (1992). Differential regulation of transcription preinitiation complex assembly by activator and repressor homeo domain proteins. *Genes Dev.* **6**, 2177-2189.
- Johnson, F. B., Parker, E. and Krasnow, M. A. (1995). Extradenticle protein is a selective cofactor for the *Drosophila* homeotics: role of the homeodomain and YPWM amino acid motif in the interaction. *Proc. Natl. Acad. Sci. USA* **92**, 739-743.
- Joshi, R., Passner, J. M., Rohs, R., Jain, R., Sosinsky, A., Crickmore, M. A., Jacob, V., Aggarwal, A. K., Honig, B. and Mann, R. S. (2007). Functional specificity of a Hox protein mediated by the recognition of minor groove structure. *Cell* **131**, 530-543.
- Joshi, R., Sun, L. and Mann, R. (2010). Dissecting the functional specificities of two Hox proteins. *Genes Dev.* **24**, 1533-1545.
- Jung, H., Lacombe, J., Mazzoni, E. O., Liem, K. F., Jr, Grinstein, J., Mahony, S., Mukhopadhyay, D., Gifford, D. K., Young, R. A., Anderson, K. V. et al. (2010). Global control of motor neuron topography mediated by the repressive actions of a single hox gene. *Neuron* **67**, 781-796.
- Jung, H., Mazzoni, E. O., Soshnikova, N., Hanley, O., Venkatesh, B., Duboule, D. and Dasen, J. S. (2014). Evolving Hox activity profiles govern diversity in locomotor systems. *Dev. Cell* **29**, 171-187.
- Kachgal, S., Mace, K. A. and Boudreau, N. J. (2012). The dual roles of homeobox genes in vascularization and wound healing. *Cell Adh. Migr.* **6**, 457-470.
- Kalis, A. K., Kissiov, D. U., Kolenbrander, E. S., Palchick, Z., Raghavan, S., Tetreault, B. J., Williams, E., Loer, C. M. and Wolff, J. R. (2014). Patterning of sexually dimorphic neurogenesis in the caenorhabditis elegans ventral cord by Hox and TALE homeodomain transcription factors. *Dev. Dyn.* **243**, 159-171.
- Kaplan, T., Li, X.-Y., Sabo, P. J., Thomas, S., Stamatoyannopoulos, J. A., Biggin, M. D. and Eisen, M. B. (2011). Quantitative models of the mechanisms that control genome-wide patterns of transcription factor binding during early *Drosophila* development. *PLoS Genet.* **7**, e1001290.
- Kim, Y.-R., Oh, K.-J., Park, R.-Y., Xuan, N. T., Kang, T.-W., Kwon, D.-D., Choi, C., Kim, M. S., Nam, K. I., Ahn, K. Y. et al. (2010). HOXB13 promotes androgen independent growth of LNCaP prostate cancer cells by the activation of E2F signaling. *Mol. Cancer* **9**, 124.
- Klump, H., Schiedlmeier, B. and Baum, C. (2005). Control of self-renewal and differentiation of hematopoietic stem cells: HOXB4 on the threshold. *Ann. N. Y. Acad. Sci.* **1044**, 6-15.
- Komuves, L. G., Shen, W.-F., Kwong, A., Stelnicki, E., Rozenfeld, S., Oda, Y., Blink, A., Krishnan, K., Lau, B., Mauro, T. et al. (2000). Changes in HOXB6 homeodomain protein structure and localization during human epidermal development and differentiation. *Dev. Dyn.* **218**, 636-647.
- Komuves, L. G., Michael, E., Arbeit, J. M., Ma, X.-K., Kwong, A., Stelnicki, E., Rozenfeld, S., Morimune, M., Yu, Q.-C. and Largman, C. (2002). HOXB4 homeodomain protein is expressed in developing epidermis and skin disorders and modulates keratinocyte proliferation. *Dev. Dyn.* **224**, 58-68.
- Krumlauf, R. (1994). Hox genes in vertebrate development. *Cell* **78**, 191-201.
- Kvon, E. Z., Stampfel, G., Yanez-Cuna, J. O., Dickson, B. J. and Stark, A. (2012). HOT regions function as patterned developmental enhancers and have a distinct cis-regulatory signature. *Genes Dev.* **26**, 908-913.
- La Celle, P. T. and Polakowska, R. R. (2001). Human homeobox HOXA7 regulates keratinocyte transglutaminase type 1 and inhibits differentiation. *J. Biol. Chem.* **276**, 32844-32853.
- Lacombe, J., Hanley, O., Jung, H., Philippidou, P., Surmeli, G., Grinstein, J. and Dasen, J. S. (2013). Genetic and functional modularity of Hox activities in the specification of limb-innervating motor neurons. *PLoS Genet.* **9**, e1003184.
- Lambert, B., Vandeputte, J., Remacle, S., Bergiers, I., Simonis, N., Twizere, J.-C., Vidal, M. and Rezsöházy, R. (2012). Protein interactions of the transcription factor Hoxa1. *BMC Dev. Biol.* **12**, 29.
- Lampe, X., Samad, O. A., Guiguen, A., Matis, C., Remacle, S., Picard, J. J., Rijli, F. M. and Rezsöházy, R. (2008). An ultraconserved Hox-Pbx responsive element resides in the coding sequence of Hoxa2 and is active in rhombomere 4. *Nucleic Acids Res.* **36**, 3214-3225.

- LaRonde-LeBlanc, N. A. and Wolberger, C.** (2003). Structure of HoxA9 and Pbx1 bound to DNA: Hox hexapeptide and DNA recognition anterior to posterior. *Genes Dev.* **17**, 2060-2072.
- Lee, H. M., Zhang, H., Schulz, V., Tuck, D. P. and Forget, B. G.** (2010). Downstream targets of HOXB4 in a cell line model of primitive hematopoietic progenitor cells. *Blood* **116**, 720-730.
- Lehnertz, B., Pabst, C., Su, L., Miller, M., Liu, F., Yi, L., Zhang, R., Kroski, J., Yung, E., Kirschner, J. et al.** (2014). The methyltransferase G9a regulates HoxA9-dependent transcription in AML. *Genes Dev.* **28**, 317-327.
- Lelli, K. M., Noro, B. and Mann, R. S.** (2011). Variable motif utilization in homeotic selector (Hox)-cofactor complex formation controls specificity. *Proc. Natl. Acad. Sci. USA* **108**, 21122-21127.
- Li, X. and McGinnis, W.** (1999). Activity regulation of Hox proteins, a mechanism for altering functional specificity in development and evolution. *Proc. Natl. Acad. Sci. USA* **96**, 6802-6807.
- Li, X., Murre, C. and McGinnis, W.** (1999). Activity regulation of a Hox protein and a role for the homeodomain in inhibiting transcriptional activation. *EMBO J.* **18**, 198-211.
- Li, X.-Y., MacArthur, S., Bourgon, R., Nix, D., Pollard, D. A., Iyer, V. N., Hechmer, A., Simirenko, L., Stapleton, M., Luengo Hendriks, C. L. et al.** (2008). Transcription factors bind thousands of active and inactive regions in the *Drosophila* blastoderm. *PLoS Biol.* **6**, e27.
- Li, X.-Y., Thomas, S., Sabo, P. J., Eisen, M. B., Stamatoiyannopoulos, J. A. and Biggin, M. D.** (2011). The role of chromatin accessibility in directing the widespread, overlapping patterns of *Drosophila* transcription factor binding. *Genome Biol.* **12**, R34.
- Li, J. J., Bickel, P. J. and Biggin, M. D.** (2014). System wide analyses have underestimated protein abundances and the importance of transcription in mammals. *PeerJ* **2**, e270.
- Li-Kroeger, D., Witt, L. M., Grimes, H. L., Cook, T. A. and Gebelein, B.** (2008). Hox and senseless antagonism functions as a molecular switch to regulate EGF secretion in the *Drosophila* PNS. *Dev. Cell* **15**, 298-308.
- Liu, H., Strauss, T. J., Potts, M. B. and Cameron, S.** (2006). Direct regulation of egl-1 and of programmed cell death by the Hox protein MAB-5 and by CEH-20, a *C. elegans* homolog of Pbx1. *Development* **133**, 641-650.
- Lohmann, I., McGinnis, N., Bodmer, M. and McGinnis, W.** (2002). The *Drosophila* Hox gene deformed sculpts head morphology via direct regulation of the apoptosis activator reaper. *Cell* **110**, 457-466.
- Lovegrove, B., Simões, S., Rivas, M. L., Sotillos, S., Johnson, K., Knust, E., Jacinto, A. and Hombria, J. C.-G.** (2006). Coordinated control of cell adhesion, polarity, and cytoskeleton underlies Hox-induced organogenesis in *Drosophila*. *Curr. Biol.* **16**, 2206-2216.
- Lu, Z., Hardt, J. and Kim, J. J.** (2008). Global analysis of genes regulated by HOXA10 in decidualization reveals a role in cell proliferation. *Mol. Hum. Reprod.* **14**, 357-366.
- Luo, L., Yang, X., Takihara, Y., Knoetgen, H. and Kessel, M.** (2004). The cell-cycle regulator geminin inhibits Hox function through direct and polycomb-mediated interactions. *Nature* **427**, 749-753.
- MacArthur, S., Li, X.-Y., Li, J., Brown, J. B., Chu, H. C., Zeng, L., Grondona, B. P., Hechmer, A., Simirenko, L., Keränen, S. V. E. et al.** (2009). Developmental roles of 21 *Drosophila* transcription factors are determined by quantitative differences in binding to an overlapping set of thousands of genomic regions. *Genome Biol.* **10**, R80.
- Mallo, M. and Alonso, C. R.** (2013). The regulation of Hox gene expression during animal development. *Development* **140**, 3951-3963.
- Mann, R. S. and Affolter, M.** (1998). Hox proteins meet more partners. *Curr. Opin. Genet. Dev.* **8**, 423-429.
- Mann, R. S. and Chan, S.-K.** (1996). Extra specificity from extradenticle: the partnership between HOX and PBX/EXD homeodomain proteins. *Trends Genet.* **12**, 258-262.
- Mann, R. S., Lelli, K. M. and Joshi, R.** (2009). Hox specificity: unique roles for cofactors and collaborators. *Curr. Top. Dev. Biol.* **88**, 63-101.
- Marchetti, L., Comelli, L., D'Innocenzo, B., Puzzi, L., Luin, S., Arosio, D., Calvello, M., Mendoza-Maldonado, R., Peverali, F., Trovato, F. et al.** (2010). Homeotic proteins participate in the function of human-DNA replication origins. *Nucleic Acids Res.* **38**, 8105-8119.
- Matis, C., Oury, F., Remacle, S., Lampe, X., Gofflot, F., Picard, J. J., Rijli, F. M. and Rezsöházy, R.** (2007). Identification of Lmo1 as part of a Hox-dependent regulatory network for hindbrain patterning. *Dev. Dyn.* **236**, 2675-2684.
- McCabe, C. D. and Innis, J. W.** (2005). A genomic approach to the identification and characterization of HOXA13 functional binding elements. *Nucleic Acids Res.* **33**, 6782-6794.
- McCabe, C. D., Spyropoulos, D. D., Martin, D. and Moreno, C. S.** (2008). Genome-wide analysis of the homeobox C6 transcriptional network in prostate cancer. *Cancer Res.* **68**, 1988-1996.
- McGinnis, N., Kuziora, M. A. and McGinnis, W.** (1990). Human Hox-4.2 and *Drosophila* deformed encode similar regulatory specificities in *Drosophila* embryos and larvae. *Cell* **63**, 969-976.
- Merabet, S., Kambris, Z., Capovilla, M., Béranger, H., Pradel, J. and Graba, Y.** (2003). The hexapeptide and linker regions of the AbdA Hox protein regulate its activating and repressive functions. *Dev. Cell* **4**, 761-768.
- Merabet, S., Saadaoui, M., Sambrani, N., Hudry, B., Pradel, J., Affolter, M. and Graba, Y.** (2007). A unique Extradenticle recruitment mode in the *Drosophila* Hox protein Ultrabithorax. *Proc. Natl. Acad. Sci. USA* **104**, 16946-16951.
- Miguez, A., Ducret, S., Di Meglio, T., Parras, C., Hmidan, H., Haton, C., Sekizar, S., Mannioui, A., Vidal, M., Kerever, A. et al.** (2012). Opposing roles for Hoxa2 and Hoxb2 in hindbrain oligodendrocyte patterning. *J. Neurosci.* **32**, 17172-17185.
- Miotto, B. and Graba, Y.** (2010). Control of DNA replication: a new facet of Hox proteins? *Bioessays* **32**, 800-807.
- Moens, C. B. and Selleri, L.** (2006). Hox cofactors in vertebrate development. *Dev. Biol.* **291**, 193-206.
- Mohit, P., Makhijani, K., Madhavi, M. B., Bharathi, V., Lal, A., Sirdesai, G., Reddy, V. R., Ramesh, P., Kannan, R., Dhawan, J. et al.** (2006). Modulation of AP and DV signaling pathways by the homeotic gene Ultrabithorax during haltere development in *Drosophila*. *Dev. Biol.* **291**, 356-367.
- Mortin, M. A., Zuerner, R., Berger, S. and Hamilton, B. J.** (1992). Mutations in the second-largest subunit of *Drosophila* RNA polymerase II interact with Ubx. *Genetics* **131**, 895-903.
- Nègre, N., Brown, C. D., Ma, L., Bristow, C. A., Miller, S. W., Wagner, U., Kheradpour, P., Eaton, M. L., Loriaux, P., Sealfon, R. et al.** (2011). A cis-regulatory map of the *Drosophila* genome. *Nature* **471**, 527-531.
- Niu, W., Lu, Z. J., Zhong, M., Sarov, M., Murray, J. I., Brdlik, C. M., Janette, J., Chen, C., Alves, P., Preston, E. et al.** (2011). Diverse transcription factor binding features revealed by genome-wide ChIP-seq in *C. elegans*. *Genome Res.* **21**, 245-254.
- Norris, J. D., Chang, C.-Y., Wittmann, B. M., Kunder, R. S., Cui, H., Fan, D., Joseph, J. D. and McDonnell, D. P.** (2009). The homeodomain protein HOXB13 regulates the cellular response to androgens. *Mol. Cell* **36**, 405-416.
- Noyes, M. B., Christensen, R. G., Wakabayashi, A., Stormo, G. D., Brodsky, M. H. and Wolfe, S. A.** (2008). Analysis of homeodomain specificities allows the family-wide prediction of preferred recognition sites. *Cell* **133**, 1277-1289.
- Ohno, Y., Yasunaga, S., Ohtsubo, M., Mori, S., Tsumura, M., Okada, S., Ohta, T., Ohtani, K., Kobayashi, M. and Takihara, Y.** (2010). Hoxb4 transduction down-regulates Geminin protein, providing hematopoietic stem and progenitor cells with proliferation potential. *Proc. Natl. Acad. Sci. USA* **107**, 21529-21534.
- Ohno, Y., Yasunaga, S., Janmohamed, S., Ohtsubo, M., Saeki, K., Kurogi, T., Mihara, K., Iscove, N. N. and Takihara, Y.** (2013). Hoxa9 transduction induces hematopoietic stem and progenitor cell activity through direct down-regulation of geminin protein. *PLoS ONE* **8**, e53161.
- Oshima, M., Endoh, M., Endo, T. A., Toyoda, T., Nakajima-Takagi, Y., Sugiyama, F., Koseki, H., Kyba, M., Iwama, A. and Osawa, M.** (2011). Genome-wide analysis of target genes regulated by HoxB4 in hematopoietic stem and progenitor cells developing from embryonic stem cells. *Blood* **117**, e142-e150.
- Oury, F., Murakami, Y., Renaud, J.-S., Pasqualetti, M., Charnay, P., Ren, S.-Y. and Rijli, F. M.** (2006). Hoxa2- and rhombomere-dependent development of the mouse facial somatosensory map. *Science* **313**, 1408-1413.
- Papagiannouli, S., Schardt, L., Grajcarek, J., Ha, N. and Lohmann, I.** (2014). The Hox gene Abd-B controls stem cell niche function in the *Drosophila* testis. *Dev. Cell* **28**, 189-202.
- Passner, J. M., Ryoo, H. D., Shen, L., Mann, R. S. and Aggarwal, A. K.** (1999). Structure of a DNA-bound Ultrabithorax-Extradenticle homeodomain complex. *Nature* **397**, 714-719.
- Pavlopoulos, A. and Akam, M.** (2011). Hox gene Ultrabithorax regulates distinct sets of target genes at successive stages of *Drosophila* haltere morphogenesis. *Proc. Natl. Acad. Sci. USA* **108**, 2855-2860.
- Pearson, J. C., Lemons, D. and McGinnis, W.** (2005). Modulating Hox gene functions during animal body patterning. *Nat. Rev. Genet.* **6**, 893-904.
- Peifer, M. and Wieschaus, E.** (1990). Mutations in the *Drosophila* gene *extradenticle* affect the way specific homeo domain proteins regulate segmental identity. *Genes Dev.* **4**, 1209-1223.
- Penkov, D., Mateos San Martin, D., Fernandez-Díaz, L. C., Rosselló, C. A., Torroja, C., Sánchez-Cabo, F., Warnatz, H. J., Sultan, M., Yaspo, M. L., Gabrieli, A. et al.** (2013). Analysis of the DNA-binding profile and function of TALE homeoproteins reveals their specialization and specific interactions with Hox genes/proteins. *Cell Rep.* **3**, 1321-1333.
- Perrin, L., Monier, B., Ponzielli, R., Astier, M. and Semeriva, M.** (2004). *Drosophila* cardiac tube organogenesis requires multiple phases of Hox activity. *Dev. Biol.* **272**, 419-431.
- Phelan, M. L., Rambaldi, I. and Featherstone, M. S.** (1995). Cooperative interactions between HOX and PBX proteins mediated by a conserved peptide motif. *Mol. Cell. Biol.* **15**, 3989-3997.
- Philippidou, P. and Dasen, J. S.** (2013). Hox genes: choreographers in neural development, architects of circuit organization. *Neuron* **80**, 12-34.
- Piper, D. E., Batchelor, A. H., Chang, C.-P., Cleary, M. L. and Wolberger, C.** (1999). Structure of a HoxB1-Pbx1 heterodimer bound to DNA: role of the hexapeptide and a fourth homeodomain helix in complex formation. *Cell* **96**, 587-597.

- Pöpperl, H., Bienz, M., Studer, M., Chan, S.-K., Aparicio, S., Brenner, S., Mann, R. S. and Krumlauf, R. (1995). Segmental expression of *Hoxb-1* is controlled by a highly conserved autoregulatory loop dependent upon *exd/pbx*. *Cell* **81**, 1031-1042.
- Post, L. C., Margulies, E. H., Kuo, A. and Innis, J. W. (2000). Severe limb defects in Hypodactyl mice result from the expression of a novel, mutant HOXA13 protein. *Dev. Biol.* **217**, 290-300.
- Potter, C. S., Pruett, N. D., Kern, M. J., Baybo, M. A., Godwin, A. R., Potter, K. A., Peterson, R. L., Sundberg, J. P. and Awgulewitsch, A. (2011). The nude mutant gene *Foxn1* is a HOXC13 regulatory target during hair follicle and nail differentiation. *J. Invest. Dermatol.* **131**, 828-837.
- Prin, F., Serpente, P., Itasaki, N. and Gould, A. P. (2014). Hox proteins drive cell segregation and non-autonomous apical remodelling during hindbrain segmentation. *Development* **141**, 1492-1502.
- Prince, F., Katsuyama, T., Oshima, Y., Plaza, S., Resendez-Perez, D., Berry, M., Kurata, S. and Gehring, W. J. (2008). The YPWM motif links Antennapedia to the basal transcriptional machinery. *Development* **135**, 1669-1679.
- Quinonez, S. C. and Innis, J. W. (2014). Human HOX gene disorders. *Mol. Genet. Metab.* **111**, 4-15.
- Raman, V., Martensen, S. A., Reisman, D., Evron, E., Odenwald, W. F., Jaffee, E., Marks, J. and Sukumar, S. (2000). Compromised HOXA5 function can limit p53 expression in human breast tumours. *Nature* **405**, 974-978.
- Ravasi, T., Suzuki, H., Cannistraci, C. V., Katayama, S., Bajic, V. B., Tan, K., Akalin, A., Schmeier, S., Kanamori-Katayama, M., Bertin, N. et al. (2010). An atlas of combinatorial transcriptional regulation in mouse and man. *Cell* **140**, 744-752.
- Rezsohazy, R. (2014). Non-transcriptional interactions of Hox proteins: inventory, facts, and future directions. *Dev. Dyn.* **243**, 117-131.
- Rhoads, K., Arderiu, G., Charboneau, A., Hansen, S. L., Hoffman, W. and Boudreau, N. (2005). A role for Hox A5 in regulating angiogenesis and vascular patterning. *Lymphat. Res. Biol.* **3**, 240-252.
- Rinn, J. L., Wang, J. K., Allen, N., Bruggmann, S. A., Mikels, A. J., Liu, H., Ridky, T. W., Stadler, H. S., Nusse, R., Helms, J. A. et al. (2008). A dermal HOX transcriptional program regulates site-specific epidermal fate. *Genes Dev.* **22**, 303-307.
- Rivas, M. L., Espinosa-Vazquez, J. M., Sambrani, N., Greig, S., Merabet, S., Graba, Y. and Hombría, J. C.-G. (2013). Antagonism versus cooperativity with TALE cofactors at the base of the functional diversification of Hox protein function. *PLoS Genet.* **9**, e1003252.
- Ronshaugen, M., McGinnis, N. and McGinnis, W. (2002). Hox protein mutation and macroevolution of the insect body plan. *Nature* **415**, 914-917.
- Roy, S., Ernst, J., Kharchenko, P. V., Kheradpour, P., Negre, N., Eaton, M. L., Landolin, J. M., Bristow, C. A., Ma, L., Lin, M. F. et al. (2010). Identification of functional elements and regulatory circuits by *Drosophila* modENCODE. *Science* **330**, 1787-1797.
- Rubin, E., Wu, X., Zhu, T., Cheung, J. C. Y., Chen, H., Lorincz, A., Pandita, R. K., Sharma, G. G., Ha, H. C., Gasson, J. et al. (2007). A role for the HOXB7 homeodomain protein in DNA repair. *Cancer Res.* **67**, 1527-1535.
- Ryoo, H. D., Marty, T., Casares, F., Affolter, M. and Mann, R. S. (1999). Regulation of Hox target genes by a DNA bound Homothorax/Hox/Extradenticle complex. *Development* **126**, 5137-5148.
- Saadaoui, M., Merabet, S., Litim-Mecheri, I., Arbeille, E., Sambrani, N., Damen, W., Brena, C., Pradel, J. and Graba, Y. (2011). Selection of distinct Hox-Extradenticle interaction modes fine-tunes Hox protein activity. *Proc. Natl. Acad. Sci. USA* **108**, 2276-2281.
- Salsi, V., Vignano, M. A., Cocchiarella, F., Mantovani, R. and Zappavigna, V. (2008). Hoxd13 binds in vivo and regulates the expression of genes acting in key pathways for early limb and skeletal patterning. *Dev. Biol.* **317**, 497-507.
- Salsi, V., Ferrari, S., Ferraresi, R., Cossarizza, A., Grande, A. and Zappavigna, V. (2009). HOXD13 binds DNA replication origins to promote origin licensing and is inhibited by geminin. *Mol. Cell. Biol.* **29**, 5775-5788.
- Sambrani, N., Hudry, B., Maurel-Zaffran, C., Zouaz, A., Mishra, R., Merabet, S. and Graba, Y. (2013). Distinct molecular strategies for Hox-mediated limb suppression in *Drosophila*: from cooperativity to dispensability/antagonism in TALE partnership. *PLoS Genet.* **9**, e1003307.
- Sanchez-Herrero, E. (2013). Hox targets and cellular functions. *Scientifica (Cairo)* **2013**, 738257.
- Schiedmeier, B., Santos, A. C., Ribeiro, A., Moncaut, N., Lesinski, D., Auer, H., Kornacker, K., Ostertag, W., Baum, C., Mallo, M. et al. (2007). HOXB4's road map to stem cell expansion. *Proc. Natl. Acad. Sci. USA* **104**, 16952-16957.
- Schild-Poulter, C., Pope, L., Giffin, W., Kochan, J. C., Ngsee, J. K., Traykova-Andonova, M. and Hache, R. J. G. (2001). The binding of Ku antigen to homeodomain proteins promotes their phosphorylation by DNA-dependent protein kinase. *J. Biol. Chem.* **276**, 16848-16856.
- Schneider, R. and Grosschedl, R. (2007). Dynamics and interplay of nuclear architecture, genome organization, and gene expression. *Genes Dev.* **21**, 3027-3043.
- Shah, N. and Sukumar, S. (2010). The Hox genes and their roles in oncogenesis. *Nat. Rev. Cancer* **10**, 361-371.
- Shen, W.-F., Chang, C.-P., Rozenfeld, S., Sauvageau, G., Humphries, R. K., Lu, M., Lawrence, H. J., Cleary, M. L. and Largman, C. (1996). Hox homeodomain proteins exhibit selective complex stabilities with Pbx and DNA. *Nucleic Acids Res.* **24**, 898-906.
- Slattery, M., Ma, L., Nègre, N., White, K. P. and Mann, R. S. (2011a). Genome-wide tissue-specific occupancy of the Hox protein Ultrabithorax and Hox cofactor Homothorax in *Drosophila*. *PLoS ONE* **6**, e14686.
- Slattery, M., Riley, T., Liu, P., Abe, N., Gomez-Alcala, P., Dror, I., Zhou, T., Rohs, R., Honig, B., Bussemaker, H. J. et al. (2011b). Cofactor binding evokes latent differences in DNA binding specificity between Hox proteins. *Cell* **147**, 1270-1282.
- Sorge, S., Ha, N., Polychronidou, M., Friedrich, J., Bezdán, D., Kaspar, P., Schaefer, M. H., Ossowski, S., Henz, S. R., Mundorf, J. et al. (2012). The cis-regulatory code of Hox function in *Drosophila*. *EMBO J.* **31**, 3323-3333.
- Stadler, H. S., Higgins, K. M. and Capecchi, M. R. (2001). Loss of Eph-receptor expression correlates with loss of cell adhesion and chondrogenic capacity in Hoxa13 mutant limbs. *Development* **128**, 4177-4188.
- Stasinopoulos, I. A., Mironchik, Y., Raman, A., Wildes, F., Winnard, P., Jr and Raman, V. (2005). HOXA5-twist interaction alters p53 homeostasis in breast cancer cells. *J. Biol. Chem.* **280**, 2294-2299.
- Stöbe, P., Stein, S. M. A., Habring-Müller, A., Bezdán, D., Fuchs, A. L., Hueber, S. D., Wu, H. and Lohmann, I. (2009). Multifactorial regulation of a hox target gene. *PLoS Genet.* **5**, e1000412.
- Stoll, S. J. and Kroll, J. (2012). HOXC9: a key regulator of endothelial cell quiescence and vascular morphogenesis. *Trends Cardiovasc. Med.* **22**, 7-11.
- Sun, M., Song, C.-X., Huang, H., Frankenberger, C. A., Sankarsharma, D., Gomes, S., Chen, P., Chen, J., Chada, K. K., He, C. et al. (2013). HMG2/TET1/HOXA9 signaling pathway regulates breast cancer growth and metastasis. *Proc. Natl. Acad. Sci. USA* **110**, 9920-9925.
- Tamayo, J. V., Gujar, M., Macdonald, S. J. and Lundquist, E. A. (2013). Functional transcriptomic analysis of the role of MAB-5/Hox in Q neuroblast migration in *Caenorhabditis elegans*. *BMC Genomics* **14**, 304.
- Taniguchi, Y. (2014). Hox transcription factors: modulators of cell-cell and cell-extracellular matrix adhesion. *Biomed. Res. Int.* **2014**, 591374.
- Topisirovic, I., Kentsis, A., Perez, J. M., Guzman, M. L., Jordan, C. T. and Borden, K. L. B. (2005). Eukaryotic translation initiation factor 4E activity is modulated by HOXA9 at multiple levels. *Mol. Cell. Biol.* **25**, 1100-1112.
- Tvrđik, P. and Capecchi, M. R. (2006). Reversal of Hox1 gene subfunctionalization in the mouse. *Dev. Cell* **11**, 239-250.
- van Dijk, M. A. and Murre, C. (1994). extradenticle raises the DNA binding specificity of homeotic selector gene products. *Cell* **78**, 617-624.
- Wang, X., Choi, J. H., Ding, J., Yang, L., Ngoko, L. C., Lee, E. J., Zha, Y., Mao, L., Jin, B., Ren, M. et al. (2013). HOXC9 directly regulates distinct sets of genes to coordinate diverse cellular processes during neuronal differentiation. *BMC Genomics* **14**, 830.
- Weatherbee, S. D., Nijhout, H. F., Grunert, L. W., Halder, G., Galant, R., Selegue, J. and Carroll, S. (1999). Ultrabithorax function in butterfly wings and the evolution of insect wing patterns. *Curr. Biol.* **9**, 109-115.
- Will, E., Speidel, D., Wang, Z., Ghiaur, G., Rimek, A., Schiedmeier, B., Williams, D. A., Baum, C., Ostertag, W. and Klump, H. (2006). HOXB4 inhibits cell growth in a dose-dependent manner and sensitizes cells towards extrinsic cues. *Cell Cycle* **5**, 14-22.
- Williams, T. M., Williams, M. E., Kuick, R., Misesk, D., McDonagh, K., Hanash, S. and Innis, J. W. (2005). Candidate downstream regulated genes of HOX group 13 transcription factors with and without monomeric DNA binding capability. *Dev. Biol.* **279**, 462-480.
- Winnik, S., Klinkert, M., Kurz, H., Zoeller, C., Heinke, J., Wu, Y., Bode, C., Patterson, C. and Moser, M. (2009). HoxB5 induces endothelial sprouting in vitro and modifies intussusceptive angiogenesis in vivo involving angiopoietin-2. *Cardiovasc. Res.* **83**, 558-565.
- Wu, Y., Moser, M., Bauth, V. L. and Patterson, C. (2003). HoxB5 is an upstream transcriptional switch for differentiation of the vascular endothelium from precursor cells. *Mol. Cell. Biol.* **23**, 5680-5691.
- Wu, X., Ellmann, S., Rubin, E., Gil, M., Jin, K., Han, L., Chen, H., Kwon, E. M., Guo, J., Ha, H. C. et al. (2012). ADP ribosylation by PARP-1 suppresses HOXB7 transcriptional activity. *PLoS ONE* **7**, e40644.
- Xu, B., Geerts, D., Bu, Z., Ai, J., Jin, L., Li, Y., Zhang, H. and Zhu, G. (2014). Regulation of endometrial receptivity by the highly expressed HOXA9, HOXA11 and HOXD10 HOX-class homeobox genes. *Hum. Reprod.* **29**, 781-790.
- Zigman, M., Laumann-Lipp, N., Titus, T., Postlethwait, J. and Moens, C. B. (2014). Hoxb1b controls oriented cell division, cell shape and microtubule dynamics in neural tube morphogenesis. *Development* **141**, 639-649.
